# Supplementary material for: Tuning photochemical properties of phosphorus(v) porphyrin photosensitizers
Source: Royal Society of Chemistry journal article supplement (doi:10.1039/c7cc06052a), 2017-01-01
Supplement: c7cc06052a1.pdf [file c7cc06052a1.pdf]

# Supporting Information

## Tuning photochemical properties of phosphorus(V) porphyrins photosensitizers

Ivan N. Meshkov<sup>a,b</sup>, Véronique Bulach<sup>a</sup>, Yulia G. Gorbunova<sup>b,c\*</sup>, Fedor E. Gostev,<sup>d</sup> Victor A. Nadtochenko,<sup>d</sup> Aslan Yu. Tsivadze<sup>b,c</sup>, and Mir Wais Hosseini<sup>a</sup>

<sup>a</sup>Molecular Tectonics Laboratory, UMR UDS-CNRS, 7140 & icFRC, Université de Strasbourg, F-67000, Strasbourg, France

<sup>b</sup>Frumkin Institute of Physical Chemistry and Electrochemistry, Russian Academy of Sciences, Leninsky pr. 31-4, Moscow, 119071 Russia

<sup>c</sup>Kurnakov Institute of General and Inorganic Chemistry, Russian Academy of Sciences, Leninsky pr. 31, Moscow, 119991 Russia

<sup>d</sup>Semenov Institute of Chemical Physics, Russian Academy of Sciences, Kosygina st. 4, Moscow, 119991 Russia  
*e-mail: yulia@igic.ras.ru, hosseini@unistra.fr*

| Experimental section |                                                                                                                                                                             | Page S3  |
|----------------------|-----------------------------------------------------------------------------------------------------------------------------------------------------------------------------|----------|
| <b>Figure S1</b>     | Experimental setups for SO measurements in organic (left) and aqueous (right) media.                                                                                        | Page S8  |
| <b>Table 1</b>       | Stokes shifts and emission maxima of P(V) porphyrins.                                                                                                                       | Page S11 |
| <b>Table 2</b>       | Quantum yields of S <sub>1</sub> -S <sub>0</sub> , S <sub>1</sub> -CT and S <sub>1</sub> -T <sub>1</sub> processes calculated from transient absorption experiments.        | Page S11 |
| <b>Scheme 1</b>      | Jablonski diagram of energy transitions in photosensitive porphyrin.                                                                                                        | Page S12 |
| <b>Figure S2</b>     | <sup>1</sup> H-NMR (bottom, CDCl <sub>3</sub> , 300 MHz, 25 °C) and <sup>31</sup> P-NMR (top right, CDCl <sub>3</sub> , 121 MHz, 25 °C) spectra of <b>2a</b> .              | Page S13 |
| <b>Figure S3</b>     | HR-ESI TOF spectrum of <b>2a</b> .                                                                                                                                          | Page S13 |
| <b>Figure S4</b>     | <sup>1</sup> H-NMR (bottom, CDCl <sub>3</sub> , 400 MHz, 25 °C) and <sup>31</sup> P-NMR (top right, CDCl <sub>3</sub> , 162 MHz, 25 °C) spectra of <b>3a</b> .              | Page S14 |
| <b>Figure S5</b>     | HR-ESI TOF spectrum of the compound <b>3a</b> .                                                                                                                             | Page S14 |
| <b>Figure S6</b>     | <sup>1</sup> H-NMR (bottom, CDCl <sub>3</sub> , 500 MHz, 25 °C) and <sup>31</sup> P-NMR (top right, CDCl <sub>3</sub> , 121 MHz, 25 °C) spectra of <b>4a</b> .              | Page S15 |
| <b>Figure S7</b>     | HR-ESI TOF spectrum of the compound <b>4a</b> .                                                                                                                             | Page S15 |
| <b>Figure S8</b>     | <sup>1</sup> H NMR (bottom, CDCl <sub>3</sub> , 300 MHz, 25 °C) and <sup>31</sup> P NMR (top right, CDCl <sub>3</sub> , 162 MHz, 25 °C) spectra of the compound <b>5a</b> . | Page S16 |
| <b>Figure S9</b>     | HR-ESI TOF spectrum of the compound <b>5a</b> .                                                                                                                             | Page S16 |
| <b>Figure S10</b>    | <sup>1</sup> H-NMR (bottom, CDCl <sub>3</sub> , 300 MHz, 25 °C) and <sup>31</sup> P-NMR (top right, CDCl <sub>3</sub> , 121 MHz, 25 °C) spectra of <b>2b</b> .              | Page S17 |
| <b>Figure S11</b>    | HR-ESI TOF spectrum of the compound <b>2b</b> .                                                                                                                             | Page S17 |
| <b>Figure S12</b>    | <sup>1</sup> H-NMR (bottom, CDCl <sub>3</sub> , 400 MHz, 25 °C) and <sup>31</sup> P-NMR (top right, CDCl <sub>3</sub> , 162 MHz, 25 °C) spectra of <b>3b</b> .              | Page S18 |
| <b>Figure S13</b>    | HR-ESI TOF spectrum of the compound <b>3b</b> .                                                                                                                             | Page S18 |
| <b>Figure S14</b>    | <sup>1</sup> H-NMR (bottom, CDCl <sub>3</sub> , 400 MHz, 25 °C) and <sup>31</sup> P-NMR (top right, CDCl <sub>3</sub> , 162 MHz, 25 °C) spectra of <b>4b</b> .              | Page S19 |
| <b>Figure S15</b>    | HR-ESI TOF spectrum of the compound <b>4b</b> .                                                                                                                             | Page S19 |
| <b>Figure S16</b>    | <sup>1</sup> H NMR (bottom, CDCl <sub>3</sub> +DMSO <sub>d6</sub> , 300 MHz, 25 °C) and <sup>31</sup> P NMR                                                                 | Page S20 |

|                   |                                                                                                                             |          |
|-------------------|-----------------------------------------------------------------------------------------------------------------------------|----------|
|                   | (top right, CDCl <sub>3</sub> +DMSO <sub>d6</sub> , 162 MHz, 25 °C) spectra of the compound <b>5b</b> .                     |          |
| <b>Figure S17</b> | HR-ESI TOF spectrum of the compound <b>5b</b> .                                                                             | Page S20 |
| <b>Figure S18</b> | Normalized UV-Vis spectra of compounds <b>2a-5a</b> in CHCl <sub>3</sub> .                                                  | Page S21 |
| <b>Figure S19</b> | Normalized UV-Vis spectra of compounds <b>2b-5b</b> in CHCl <sub>3</sub> .                                                  | Page S21 |
| <b>Figure S20</b> | Normalized UV-Vis spectra of compounds <b>2a-5a</b> in DMSO.                                                                | Page S22 |
| <b>Figure S21</b> | Normalized UV-Vis spectra of compounds <b>2b-5b</b> in DMSO.                                                                | Page S22 |
| <b>Figure S22</b> | Normalized UV-Vis spectra of compounds <b>3a-5a</b> in water.                                                               | Page S23 |
| <b>Figure S23</b> | Normalized UV-Vis spectra of compounds <b>3b-5b</b> in water.                                                               | Page S23 |
| <b>Figure S24</b> | Normalized fluorescence spectra ( $\lambda_{\text{ex}} = 550 \text{ nm}$ ) of compounds <b>2a-5a</b> in CHCl <sub>3</sub> . | Page S24 |
| <b>Figure S25</b> | Normalized fluorescence spectra ( $\lambda_{\text{ex}} = 550 \text{ nm}$ ) of compounds <b>2b-5b</b> in CHCl <sub>3</sub> . | Page S24 |
| <b>Figure S26</b> | Normalized fluorescence spectra ( $\lambda_{\text{ex}} = 550 \text{ nm}$ ) of compounds <b>2a-5a</b> in DMSO.               | Page S25 |
| <b>Figure S27</b> | Normalized fluorescence spectra ( $\lambda_{\text{ex}} = 550 \text{ nm}$ ) of compounds <b>2b-5b</b> in DMSO.               | Page S25 |
| <b>Figure S28</b> | Normalized fluorescence spectra ( $\lambda_{\text{ex}} = 550 \text{ nm}$ ) of compounds <b>3a-5a</b> in water.              | Page S26 |
| <b>Figure S29</b> | Normalized fluorescence spectra ( $\lambda_{\text{ex}} = 550 \text{ nm}$ ) of compounds <b>3b-5b</b> in water.              | Page S26 |
| <b>Figure S30</b> | Degradation of DPBF in the chloroform solution of <b>2a</b> .                                                               | Page S27 |
| <b>Figure S31</b> | Degradation of DPBF in the chloroform solution of <b>2a</b> – plot of DPBF peak (415 nm) vs time                            | Page S27 |
| <b>Figure S32</b> | Transient spectra at early time delays of <b>2a, 4a, 5a</b>                                                                 | Page S28 |
| <b>Figure S33</b> | 2D maps of transient spectra changes vs time delay.                                                                         | Page S29 |
| <b>Figure S34</b> | Transient spectra in the region of the Soret band vs time delay of <b>2a, 4a, 5a</b>                                        | Page S30 |
| <b>Figure S35</b> | Transient absorption spectra of complexes <b>4a</b> and <b>5a</b>                                                           | Page S31 |
|                   | Intramolecular energy transitions without CT state for compounds <b>2, 3</b> and <b>5</b> .                                 | Page S32 |
|                   | Intramolecular energy transitions with CT state for compounds <b>4</b> .                                                    | Page S33 |
|                   | Calculated transient absorption spectra data for complexes <b>2-5</b> .                                                     | Page S34 |
| <b>Figure S36</b> | Calculated molecular orbitals of <b>2a</b> .                                                                                | Page S35 |
| <b>Figure S37</b> | Calculated molecular orbitals of <b>3a</b> .                                                                                | Page S35 |
| <b>Figure S38</b> | Calculated molecular orbitals of <b>4a</b> .                                                                                | Page S35 |
| <b>Figure S39</b> | Calculated molecular orbitals of <b>5a</b> .                                                                                | Page S35 |
| <b>Figure S40</b> | Calculated molecular orbitals of <b>2b</b>                                                                                  | Page S36 |
| <b>Figure S41</b> | Calculated molecular orbitals of <b>3b</b>                                                                                  | Page S36 |
| <b>Figure S42</b> | Calculated molecular orbitals of <b>4b</b>                                                                                  | Page S36 |
| <b>Figure S43</b> | Calculated molecular orbitals of <b>5b</b>                                                                                  | Page S36 |
| <b>References</b> |                                                                                                                             | Page S37 |

## Experimental section

**General procedures.** Solvents were dried using standard techniques: CH<sub>2</sub>Cl<sub>2</sub> and CHCl<sub>3</sub> were distilled over CaH<sub>2</sub>. All air and water sensitive experiments were carried out under argon atmosphere using standard vacuum line techniques. All chemicals were obtained commercially and used without further purification, except pyrrole which was purified over an alumina column before use.

<sup>1</sup>H, <sup>13</sup>C and <sup>31</sup>P NMR spectra were acquired on either a Bruker AV 300 (300MHz), a Bruker AV 400 (400 MHz) or a Bruker AV 500 (500 MHz) spectrometer, with a deuterated solvent as the lock and residual solvent as the internal reference. Absorption spectra were recorded using either a Lambda 650S spectrophotometer (PerkinElmer) or an Evolution 210 spectrophotometer (Thermo Scientific). A MicroTOF-Q LC (Bruker Daltonics, Bremen) spectrometer equipped with an electrospray source was used for the high-resolution electrospray mass spectrometry measurements (HR ESI-MS). BioRad Bio Beads S-X1 and S-X3 gels were used for the gel-permeation chromatography (GPC).

**Synthesis.** Here, only the synthetic procedures for the preparation of the P(V) complexes **2a-5a** and **2b-5b** are given. Free-base porphyrins **1a-1b** were prepared following previously described procedure.<sup>1</sup>

**Compound 2a** was obtained according to a modified literature procedure<sup>2</sup>. The free-base porphyrin **1a** (0.1 g, 0.16 mmol, 1 equiv) was dissolved in 18 ml of pyridine under argon and POCl<sub>3</sub> (2 ml, 21.96 mmol, 135 equiv) was added dropwise to the mixture under stirring. A solution of PCl<sub>5</sub> (0.1 g, 0.48 mmol, 3 equiv) in 2 ml of pyridine was then added dropwise and the mixture was refluxed under argon during 24 h. After cooling to the room temperature and evaporation of pyridine under vacuum, the dark green solid was dissolved in 50 ml of CH<sub>2</sub>Cl<sub>2</sub> and washed with distilled water (3 x 400 ml) to remove residual pyridine. The organic layer was isolated and after evaporation of CH<sub>2</sub>Cl<sub>2</sub>, the green solid was purified by column chromatography on alumina using CH<sub>2</sub>Cl<sub>2</sub>-methanol (95:5) as eluent. The major main fraction was isolated and evaporated to dryness before it was further purified by chromatography on BioBeads S-X3 column (eluent – chloroform) affording 0.1 g (yield 82%) of pure compound **2a** as a green solid. <sup>1</sup>H NMR (CDCl<sub>3</sub>, 300 MHz): δ 7.80 (m, 12H, CH<sub>Ph meta/para</sub>), 7.99 (m, 8H, CH<sub>Ph ortho</sub>), 9.14 (d, <sup>4</sup>J<sub>P-H</sub> = 4.5 Hz, 8H, CH<sub>β-pyrrolic</sub>). <sup>31</sup>P NMR (CDCl<sub>3</sub>, 121 MHz): δ -229. <sup>13</sup>C NMR (CDCl<sub>3</sub>, 125 MHz): δ 117.7 (C, <sup>3</sup>J<sub>P-C</sub> = 3.3 Hz), 128.8 (CH), 130.5 (CH), 132.8 (CH, <sup>3</sup>J<sub>P-C</sub> = 6.5 Hz),

133.3 (CH), 134.2 (C), 140.0 (C). UV-Vis (CHCl<sub>3</sub>)  $\lambda$  max (nm) (log $\epsilon$ , mol<sup>-1</sup> L cm<sup>-1</sup>) 440 (5.44), 568 (4.13), 613 (4.00). HR-ESI MS:  $m/z$  obsd 713.1407, calcd 713.1423 [(M-Cl)<sup>+</sup>; M = C<sub>44</sub>H<sub>28</sub>Cl<sub>3</sub>N<sub>4</sub>P].

**Compound 3a.** The porphyrin **1a** (0.1 g, 0.16 mmol, 1 equiv) was dissolved in pyridine (60 ml) under argon and POBr<sub>3</sub> (1.1 g, 4.06 mmol, 25 equiv) previously dissolved in pyridine (20 ml) was added dropwise to the mixture under stirring. The reaction mixture was refluxed during 80 min under argon and then cooled to room temperature. The green mixture was then poured into 150 ml of CH<sub>2</sub>Cl<sub>2</sub> and 2L of distilled water was added and the mixture stirred during 2 days at room temperature until full hydrolysis of [P(TPP)(Br)<sub>2</sub>]Br to the dihydroxy complex [P(TPP)(OH)<sub>2</sub>]<sup>+</sup>Br<sup>-</sup> was completed. The organic layer was isolated and diluted with petroleum ether (150 ml). The mixture was poured directly on a SiO<sub>2</sub> chromatography column without evaporation of solvents. Increasing the polarity of the eluent using CH<sub>2</sub>Cl<sub>2</sub>-MeOH mixture (90:10) gives the crude product. Further purification of product by Bio-Beads S-X1 GPC (eluent – chloroform-methanol 98:2) afforded 0.115 g of the pure purple compound **3a** in 95 % yield. <sup>1</sup>H NMR (CDCl<sub>3</sub>, 400 MHz):  $\delta$  7.69 (m, 12H, CH<sub>Ph meta/para</sub>), 8.01 (m, 8H, CH<sub>Ph ortho</sub>), 8.89 (d, <sup>4</sup>J<sub>P-H</sub> = 2.7 Hz, 8H, CH <sub>$\beta$ -pyrrolic</sub>). <sup>31</sup>P NMR (CDCl<sub>3</sub>, 162 MHz):  $\delta$  -193. <sup>13</sup>C NMR (CDCl<sub>3</sub>, 125 MHz):  $\delta$  115.9 (C), 127.7 (CH), 128.7 (CH), 132.0 (CH), 133.7 (CH), 134.7 (C), 139.5 (C). UV-Vis (CHCl<sub>3</sub>)  $\lambda$  max (nm) (log $\epsilon$ , mol<sup>-1</sup> L cm<sup>-1</sup>) 428 (5.42), 556 (4.21), 596 (3.92). HR-ESI MS:  $m/z$  obsd 677.2084, calcd 677.2101 [(M-Br)<sup>+</sup>, M = C<sub>44</sub>H<sub>30</sub>BrN<sub>4</sub>O<sub>2</sub>P].

**Compound 4a.** The complex **2a** (0.04 g, 0.053 mmol, 1 equiv) was dissolved in pyridine (10 ml) then 3-methoxyphenol (17  $\mu$ l, 0.155 mmol, 3 equiv) previously dissolved in 5 ml of pyridine was added dropwise. The reaction mixture was refluxed overnight under argon. Pyridine was removed under vacuum and the solid residue was purified by column chromatography on alumina using a mixture of methanol-CH<sub>2</sub>Cl<sub>2</sub> as an eluent (from 0% to 10% of MeOH). Further purification by Bio-Beads S-X1 GPC (eluent - chloroform-methanol 98:2) afforded 24 mg of the pure green product **4a** (50% yield). <sup>1</sup>H NMR (CDCl<sub>3</sub>, 500 MHz):  $\delta$  1.25 (br., 2H, CH<sub>Res</sub>), 1.80 (d, <sup>3</sup>J = 8.2 Hz, 2H, CH<sub>Res</sub>), 3.11 (s, 6H, CH<sub>3</sub>), 5.68 (d, <sup>3</sup>J = 8.3 Hz, 2H, CH<sub>Res</sub>), 5.84 (dd, <sup>3</sup>J = 8.2 Hz, <sup>3</sup>J = 8.2 Hz, 2H, CH<sub>Res</sub>), 7.76 (m, 20H, CH<sub>Ph</sub>), 9.04 (d, <sup>4</sup>J<sub>P-H</sub> = 2.7 Hz, 8H, CH <sub>$\beta$ -pyrrolic</sub>). <sup>31</sup>P NMR (CDCl<sub>3</sub>, 162 MHz):  $\delta$  -196. <sup>13</sup>C NMR (CDCl<sub>3</sub>, 125 MHz):  $\delta$  54.9 (CH<sub>3</sub>), 101.5 (CH, <sup>3</sup>J<sub>P-C</sub> = 8.8 Hz), 106.8 (CH, <sup>3</sup>J<sub>P-C</sub> = 8.6 Hz), 107.6 (CH), 117.2 (C), 128.4 (CH), 128.6 (CH), 130.1 (CH), 133.4 (CH, <sup>3</sup>J<sub>P-C</sub> = 6.1 Hz), 133.6 (CH), 134.9 (C), 139.6 (C), 150.1 (C, <sup>2</sup>J<sub>P-C</sub> = 17.4 Hz), 158.7



(C). UV-Vis (CHCl<sub>3</sub>)  $\lambda$  max (nm) ( $\log\epsilon$ , mol<sup>-1</sup> L cm<sup>-1</sup>) 435 (5.00), 565 (4.10), 606 (3.79). HR-ESI MS:  $m/z$  obsd 889.2944, calcd 889.2938 [(M-Cl)<sup>+</sup>]; M = C<sub>58</sub>H<sub>42</sub>ClN<sub>4</sub>O<sub>4</sub>P.

**Compound 5a.** The porphyrin **1a** (0.1 g, 0.16 mmol, 1 equiv) was dissolved in pyridine (60 ml) under argon and POBr<sub>3</sub> (1.1 g, 4.06 mmol, 25 equiv) previously dissolved in pyridine (20 ml) was added dropwise to the mixture under stirring. The reaction mixture was refluxed during 80 min under argon and then cooled to room temperature. The green mixture was then poured into 100 ml of ethanol and the obtained mixture stirred 2 days at room temperature until full transformation of the Br-intermediate into the target compound. The mixture was diluted with CH<sub>2</sub>Cl<sub>2</sub> (200 ml) and washed with distilled water (3 x 500 ml) to remove pyridine and ethanol. The organic layer was isolated, diluted with 200 ml of petroleum ether and poured directly on a SiO<sub>2</sub> chromatography column without evaporation of solvents. Increasing the polarity of the eluent using CH<sub>2</sub>Cl<sub>2</sub>-MeOH mixture (90:10) gives the crude product. Further purification by Bio-Beads S-X1 GPC (eluent – CHCl<sub>3</sub>-MeOH 98:2) afforded 84 mg of the pure purple compound **5a** in 64% yield. <sup>1</sup>H NMR (CDCl<sub>3</sub>, 300 MHz):  $\delta$  -2.34 (dq, <sup>3</sup>J<sub>P-H</sub> = 14.0 Hz, <sup>3</sup>J = 7.0 Hz, 4H, CH<sub>2</sub>), -1.79 (td, <sup>3</sup>J = 7.3 Hz, <sup>4</sup>J<sub>P-H</sub> = 2.1 Hz, 6H, CH<sub>3</sub>), 7.79 (m, 12H, CH<sub>Ph meta/para</sub>), 7.95 (m, 8H, CH<sub>Ph ortho</sub>), 9.07 (d, <sup>4</sup>J<sub>P-H</sub> = 2.7 Hz, 8H, CH <sub>$\beta$ -pyrrolic</sub>). <sup>31</sup>P NMR (CDCl<sub>3</sub>, 162 MHz):  $\delta$  -179. <sup>13</sup>C NMR (CDCl<sub>3</sub>, 125 MHz):  $\delta$  13.1 (CH<sub>3</sub>, <sup>3</sup>J<sub>P-C</sub> = 16.4 Hz), 56.9 (CH<sub>2</sub>, <sup>2</sup>J<sub>P-C</sub> = 15.0 Hz), 115.4 (C, <sup>3</sup>J<sub>P-C</sub> = 2.0 Hz), 128.6 (CH), 129.9 (CH), 132.2 (CH, <sup>3</sup>J<sub>P-C</sub> = 5.0 Hz), 133.3 (CH), 135.4 (C), 139.2 (C). UV-Vis (CHCl<sub>3</sub>)  $\lambda$  max (nm) ( $\log\epsilon$ , mol<sup>-1</sup> L cm<sup>-1</sup>) 429 (5.44), 558 (4.23), 595 (4.02). HR-ESI MS:  $m/z$  obsd 733.2737, calcd 733.2727 [(M-Br)<sup>+</sup>], M = C<sub>48</sub>H<sub>38</sub>BrN<sub>4</sub>O<sub>2</sub>P.

**Compound 2b.** The porphyrin **1b** (0.1 g, 0.16 mmol, 1 equiv) was dissolved in pyridine (20 ml) and solutions of POCl<sub>3</sub> (2 ml, 21.93 mmol, 135 equiv) and PCl<sub>5</sub> (0.1 g, 0.49 mmol, 3 equiv) in 2 ml of pyridine were added dropwise under argon. The mixture was refluxed during 72 h under argon. The pyridine was evaporated under vacuum and the green residue was purified by column chromatography on alumina. Gradual addition of methanol up to 5% afforded the crude compound. After evaporation, the solid was further purified by Bio-Beads S-X1 GPC with chloroform as the eluent affording 48 mg (yield 40%) of compound **2b** as a green solid. **Method B.** The porphyrin **3b** (19 mg, 0.038 mmol, 1 equiv), (see below) was dissolved in chloroform (5 ml) under argon and SOCl<sub>2</sub> (2 ml, 27 mmol, 720 equiv) was added. The mixture was stirred during 12 h at room temperature and the solvent as well as excess of thionyl chloride were removed under vacuum. Chloroform (5 ml) was added and the mixture was passed through Bio-

Beads S-X1 GPC column with chloroform as eluent affording 19 mg (100% yield) of the compound **2b** as a green solid.  $^1\text{H}$  NMR ( $\text{CDCl}_3 + \text{DMSO-d}_6$ , 300 MHz):  $\delta$  7.48 (m, 9H,  $\text{CH}_{\text{Ph}}$  meta/para), 7.63 (d,  $^3J = 6.7$  Hz, 6H,  $\text{CH}_{\text{Ph}}$  ortho), 7.79 (m, 2H,  $\text{CH}_{\text{Py}}$  ortho), 8.78-8.88 (m, 10H,  $\text{CH}_{\beta}$ -pyrrolic/Py meta).  $^{31}\text{P}$  NMR ( $\text{CDCl}_3 + \text{DMSO-d}_6$ , 121 MHz):  $\delta$  -229.  $^{13}\text{C}$  NMR ( $\text{CDCl}_3 + \text{DMSO-d}_6$ , 125 MHz):  $\delta$  111.5 (C), 118.4 (C,  $^3J_{\text{P-C}} = 3.0$  Hz), 118.7 (C,  $^3J_{\text{P-C}} = 3.0$  Hz), 127.7 (C), 128.1 (C), 128.9 (CH), 130.6 (CH,  $^3J_{\text{P-C}} = 3.4$  Hz), 133.1 (CH,  $^3J_{\text{P-C}} = 6.6$  Hz), 133.3 (CH,  $^3J_{\text{P-C}} = 6.6$  Hz), 133.4 (CH), 133.5 (CH), 134.0 (CH), 134.1 (CH), 134.6 (CH,  $^3J_{\text{P-C}} = 6.5$  Hz), 138.7 (C), 139.8 (C), 140.3 (C), 140.4 (C). UV-Vis ( $\text{CHCl}_3$ )  $\lambda$  max (nm) ( $\log\epsilon$ ,  $\text{mol}^{-1} \text{L cm}^{-1}$ ) 439 (5.32), 570 (4.02), 608 (3.81). HR-ESI MS:  $m/z$  obsd 714.1341, calcd 714.1376 [(M-Cl) $^+$ ; M =  $\text{C}_{43}\text{H}_{27}\text{Cl}_3\text{N}_5\text{P}$ ].

**Compound 3b.** The porphyrin **1b** (63 mg, 0.1 mmol, 1 equiv) was dissolved in pyridine (30 ml) under argon and a solution of  $\text{POBr}_3$  (1.17 g, 4.09 mmol, 40 equiv) in pyridine (20 ml) was added dropwise under stirring. The reaction mixture was refluxed during 1.5 h under argon and then cooled to room temperature. After adding  $\text{CH}_2\text{Cl}_2$  (150 ml), to the green suspension 2 L of distilled water was added and the mixture stirred at room temperature during 1 day until full hydrolysis of  $\text{P}(\text{MPyP})(\text{Br})_2]^+\text{Br}^-$  to the dihydroxy complex  $[\text{P}(\text{MPyP})(\text{OH})_2]^+\text{Br}^-$  was completed. The organic layer was isolated and placed on a silica gel chromatography column without evaporation of  $\text{CH}_2\text{Cl}_2$ . Increasing the methanol ratio in the eluent up to 15% give the crude product. Further purification by Bio-Beads S-X1 GPC (eluent - chloroform-methanol 98:2) afforded 65 mg (85% yield) of the pure purple compound **3b**.  $^1\text{H}$  NMR ( $\text{CDCl}_3$ , 400 MHz):  $\delta$  - 3.85 (br., 2H, OH), 7.71 (m, 9H,  $\text{CH}_{\text{Ph}}$  meta/para), 7.95 (m, 2H,  $\text{CH}_{\text{Py}}$  ortho), 8.00 (m, 6H  $\text{CH}_{\text{Ph}}$  ortho), 8.68 (dd,  $^3J = 5.1$  Hz,  $^4J_{\text{P-H}} = 1.3$  Hz, 2H,  $\text{CH}_{\beta}$ -pyrrolic), 8.76 (d,  $^4J_{\text{P-H}} = 1.3$  Hz, 4H,  $\text{CH}_{\beta}$ -pyrrolic), 8.78 (dd,  $^3J = 5.1$  Hz,  $^4J_{\text{P-H}} = 1.3$  Hz, 2H,  $\text{CH}_{\beta}$ -pyrrolic), 8.92 (m, 2H,  $\text{CH}_{\text{Py}}$  meta).  $^{31}\text{P}$  NMR ( $\text{CDCl}_3$ , 162 MHz):  $\delta$  -193.  $^{13}\text{C}$  NMR ( $\text{CDCl}_3$ , 125 MHz):  $\delta$  111.8 (C), 116.2 (C), 116.4 (C), 126.9 (CH), 127.8 (CH), 128.3 (CH), 129.0 (CH), 129.5 (CH), 131.4 (CH), 132.4 (C), 132.5 (CH), 132.9 (CH), 133.6 (CH), 134.7 (CH), 138.3 (C), 139.4 (C), 139.5 (C), 147.6 (CH), 148.6 (CH). UV-Vis ( $\text{CHCl}_3$ )  $\lambda$  max (nm) ( $\log\epsilon$ ,  $\text{mol}^{-1} \text{L cm}^{-1}$ ) 428 (5.24), 556 (4.02), 598 (3.32). HR-ESI MS:  $m/z$  obsd 339.6031, calcd 339.6063 [(M+H-Br) $^{2+}$ ]; obsd 678.2036, calcd 678.2053 [(M-Br) $^+$ ]; M =  $\text{C}_{43}\text{H}_{29}\text{BrN}_5\text{O}_2\text{P}$ .

**Compound 4b.** The porphyrin **2b** (50 mg, 0.067 mmol, 1 equiv) was dissolved in pyridine (10 ml) and then a solution of 3-methoxyphenol (22  $\mu\text{l}$ , 0.20 mmol, 3 equiv) in pyridine (5 ml)

was added dropwise. The reaction mixture was refluxed overnight under argon. Pyridine was removed under vacuum and the solid residue was purified by column chromatography on silica gel using methanol-CH<sub>2</sub>Cl<sub>2</sub> mixture as the eluent (from 0% to 15% of MeOH). Further purification by Bio-Beads S-X1 GPC (eluent - chloroform-methanol 98:2) afforded 30 mg (yield 50%) of the compound **4b** as a green solid. <sup>1</sup>H NMR (CDCl<sub>3</sub>, 400 MHz): δ 1.24 (br., 2H, CH<sub>Res</sub>), 1.75 (br., 2H, CH<sub>Res</sub>), 3.11 (s, 6H, CH<sub>3</sub>), 5.68 (d, <sup>3</sup>J = 8.0 Hz, 2H, CH<sub>Res</sub>), 5.84 (dd, <sup>3</sup>J = 8.0 Hz, <sup>3</sup>J = 8.0 Hz, 2H, CH<sub>Res</sub>), 7.69-7.81 (m, 17H, CH<sub>Ph</sub>, CH<sub>Py ortho</sub>), 9.06 (m, 8H, CH<sub>β-pyrrolic</sub>), 9.12 (m, 2H, CH<sub>Py meta</sub>). <sup>31</sup>P NMR (CDCl<sub>3</sub>, 162 MHz): δ -195. <sup>13</sup>C NMR (CDCl<sub>3</sub>, 125 MHz): δ 55.0 (CH<sub>3</sub>), 101.7 (CH, <sup>3</sup>J<sub>P-C</sub> = 9.0 Hz), 106.8 (CH, <sup>3</sup>J<sub>P-C</sub> = 9.1 Hz), 107.6, (CH), 117.8 (C) 128.5 (CH), 128.6 (CH), 130.2 (CH), 132.7 (CH), 133.6 (CH), 133.8 (CH), 134.4 (CH), 134.7 (CH), 139.5 (C), 139.7 (C), 139.8 (C), 150.0 (C), 158.7 (C). UV-Vis (CHCl<sub>3</sub>) λ max (nm) (logε, mol<sup>-1</sup> L cm<sup>-1</sup>) 434 (5.00), 564 (4.00), 606 (3.61). HR-ESI MS: *m/z* obsd 445.6458, calcd 445.6482 [(M+H-Cl)<sup>2+</sup>]; obsd 890.2873, calcd 890.2891 [(M-Cl)<sup>+</sup>]; M = C<sub>57</sub>H<sub>41</sub>ClN<sub>5</sub>O<sub>4</sub>P.

**Compound 5b.** The porphyrin **1b** (95 mg, 0.15 mmol, 1 equiv) was dissolved in pyridine (30 ml) under argon and POBr<sub>3</sub> (1.77 g, 6.17 mmol, 40 eq.) previously dissolved in pyridine (20 ml) was added dropwise to the mixture under stirring. The reaction mixture was refluxed for 1,5 h under argon and then cooled to room temperature. The green mixture was then poured into 200 ml of ethanol and the obtained mixture stirred 1 day at room temperature until full transformation of the Br-intermediate into the target compound. The mixture was diluted with CH<sub>2</sub>Cl<sub>2</sub> (500 ml) and washed with distilled water (5 x 500 ml) to remove pyridine and ethanol. The organic layer was isolated and poured on a SiO<sub>2</sub> chromatography column without evaporation of solvents. Increasing the polarity of the eluent using CH<sub>2</sub>Cl<sub>2</sub>-MeOH mixture (85:15) gives the crude product. Further purification by Bio-Beads S-X1 GPC (eluent - CHCl<sub>3</sub>-MeOH 98:2) afforded 84 mg (yield 66%) of the pure purple compound **5b** in 66% yield. <sup>1</sup>H NMR (CDCl<sub>3</sub>+DMSO<sub>d6</sub>, 300 MHz): δ -2.35 (dq, <sup>3</sup>J<sub>P-H</sub> = 13.7 Hz, <sup>3</sup>J = 7.3 Hz, 4H, CH<sub>2</sub>), -1.74 (td, <sup>3</sup>J = 7.0 Hz, <sup>4</sup>J<sub>P-H</sub> = 2.1 Hz, 6H, CH<sub>3</sub>), 7.55-7.75 (m, 9H, CH<sub>Ph meta/para</sub>), 7.82 (m, 8H, CH<sub>Ph ortho/Py ortho</sub>), 8.81-9.02 (m, 10H, CH<sub>β-pyrrolic/Py meta</sub>). <sup>31</sup>P NMR (CDCl<sub>3</sub>+DMSO<sub>d6</sub>, 162 MHz): δ -179. <sup>13</sup>C NMR (CDCl<sub>3</sub>+DMSO<sub>d6</sub>, 125 MHz): δ 13.1 (CH<sub>3</sub>, <sup>2</sup>J<sub>P-C</sub> = 16.2 Hz), 56.9 (CH<sub>2</sub>), 112.2 (C), 116.7 (C), 117.0 (C), 128.0 (CH), 128.7 (CH), 129.9 (CH), 130.0 (CH), 132.5 (CH, <sup>3</sup>J<sub>P-C</sub> = 5.0 Hz), 133.4 (CH), 133.5 (CH, <sup>3</sup>J<sub>P-C</sub> = 5.2 Hz), 133.6 (CH, <sup>3</sup>J<sub>P-C</sub> = 5.4 Hz), 134.1 (CH, <sup>3</sup>J<sub>P-C</sub> = 5.1 Hz), 135.1 (CH), 135.2 (C), 138.1 (C), 139.2 (C), 139.3 (C), 139.5 (C), 149.6 (CH). UV-Vis

(CHCl<sub>3</sub>) λ, max (nm) (logε, mol<sup>-1</sup> L cm<sup>-1</sup>) 431 (5.16), 559 (3.92), 602 (3.50). HR-ESI MS: *m/z* obsd 367.6361, calcd 367.6376 [(M+H-Br)<sup>2+</sup>]; obsd 734.4825, calcd 734.2679 [(M-Br)<sup>+</sup>]; M = C<sub>47</sub>H<sub>38</sub>BrN<sub>5</sub>O<sub>2</sub>P.

### Singlet oxygen and fluorescence experiments.

CHCl<sub>3</sub> was distilled over CaH<sub>2</sub>; DMSO was frozen in a fridge (+4 °C), liquid phase was removed and residual solid was melted back; water was distilled with a standard distiller.

The photoluminescence spectra (λ<sub>ex</sub> = 550 nm) at 25 °C were recorded in quartz cells on a Horiba Scientific Fluorolog spectrofluorimeter. Fluorescence quantum yields (Φ<sub>F</sub>) were determined by a comparative method using **Eq. (1)**:

$$\Phi_F = \Phi_F^{St} \frac{F \cdot A^{St} \cdot n^2}{F^{St} \cdot A \cdot n_{St}^2} \quad (1)$$

where Φ<sub>F</sub><sup>St</sup> is fluorescence quantum yield of the standard, F and F<sup>St</sup> areas under the fluorescence emission peaks of the samples and the standard, respectively; A and A<sup>St</sup> are absorptions of the sample and the standard at the excitation wavelengths, respectively; n<sup>2</sup> and n<sub>St</sub><sup>2</sup> are the refractive indices of solvents used for the sample and the standard, respectively. **1a** in toluene (Φ<sub>F</sub> = 0.11)<sup>3</sup> was used as a standard.

A special experimental setup was constructed for singlet oxygen quantum yield determination experiments. Two modifications of it was used for organic and aqueous media.

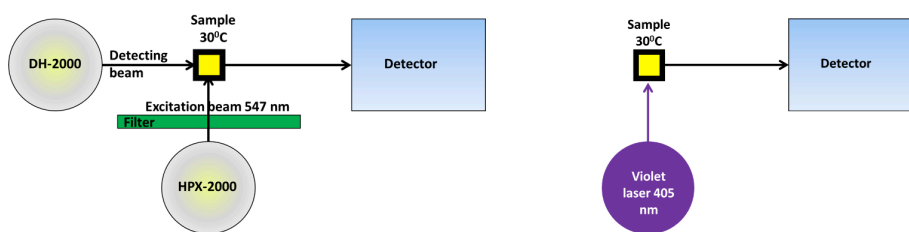

**Figure S1** Experimental setups for SO measurements in organic (left) and aqueous (right) media.

In case of organic solvents and DPBF as a singlet oxygen sensitive trap (**Fig. 2, Fig. S30-S31**), a Xenon lamp (HPX-2000, Ocean Optics), equipped with a narrow green filter (transmission maximum at 547 nm) was used for irradiation of the sample. A halogen lamp, equipped with an attenuator, (DH-2000, Ocean Optics) and a detector (in absorption mode) was installed orthogonally. Absorption spectra were registered every 2 sec. **1a** in chloroform (Φ<sub>Δ</sub> = 0.50)<sup>4</sup> was used as a reference. In case of aqueous solutions and SOSG as a singlet oxygen

sensitive trap (**Fig. 2**), a violet semi-conducting laser (405 nm, STAR405F10, Roithner Laser Technik) was used for irradiation of the sample. The detector was switched to emission mode and connected orthogonally. Emission spectra were registered every 5 sec. 5,10,15,20-tetra(4-sulfonatophenyl)-porphyrin in water ( $\Phi_{\Delta} = 0.64$ )<sup>5</sup> was used as a reference.

Samples were prepared in open quartz cells in 2.4 ml of the solvent with the concentration  $ca \sim 10^{-6}$  M;  $c$  (DPBF) =  $5 \times 10^{-5}$  M;  $c$  (SOSG) =  $1.16 \times 10^{-3}$  M. Each sample was measured at 30 °C with permanent stirring. Solutions were not degassed or extra bubbled with air (oxygen), thus concentration of O<sub>2</sub> was close to literature values: 0.742 mole fraction at 30 °C and 100 kPa.<sup>6</sup>

Quantum yields of singlet oxygen generation ( $\Phi_{\Delta}$ ) were determined by a comparative method using **Eq. (2)**:

$$\Phi_{\Delta} = \Phi_{\Delta}^{St} \frac{R \cdot I^{St}}{R^{St} \cdot I} \quad (2)$$

where  $\Phi_{\Delta}^{St}$  is the singlet oxygen quantum yield of the standard;  $R$  and  $R^{St}$  are rates of DPBF photobleaching (or SOSG luminescence increasing) in the presence of the sample and the standard, respectively;  $I$  and  $I^{St}$  are the integral light absorption values of the sample and the standard, respectively.

The solution of investigated porphyrin mixed with DPBF has an overlapped spectrum (**Fig. 2**) – Soret-band and DPBF-band are located in the same area. The exception is complex **2a**: two individual peaks are observed (**Fig. S30**), since Soret-band undergoes significant bathochromic shift after complexation with phosphorus. Free-base TPP **1a** was used as a standard with known quantum yield of singlet oxygen generation. Porphyrins were irradiated into Q-bands area with Xenon lamp equipped with narrow filter (547 nm). This region also avoids direct influence to DPBF and its photodegradation.<sup>7</sup> Moreover, in chloroform experiments, negative factors of its irradiation and further formation of phosgene and hydrochloric acid were avoided.

In case of aqueous solution, it is not possible to use previous scheme of the setup anymore, since SOSG-EP emits at 530 nm. Thus, samples in water were irradiated with violet laser 405 nm. Fluorescence of SOSG-EP was registered and used for further calculations (**Fig. 2**). Using described methods and procedures, values of singlet oxygen generation quantum yields for eight

different P(V) porphyrins are calculated and given in the table 1. Since complexes **2** hydrolyze in the presence of moisture they were not involved into investigations in distilled water.

### **Transient absorption spectroscopy experiments.**

Transient absorption spectra were measured by the femtosecond pump to supercontinuum probe setup. The output of a Ti: sapphire oscillator (800 nm, 80 MHz, 80 fs, «Tsunami», «Spectra-Physics», USA) was amplified by a regenerative amplifier system («Spitfire», «Spectra-Physics», USA) at the repeating rate of 1 KHz. Frequency control of laser pulses was produced by regular device synchronization and control amplifier SDG II Spitfire 9132, manufactured by Spectra-physics (USA). The device allowed to change the pulse repetition frequency of the amplifier output from 0 to 1000 Hz. The amplified pulses were split into two beams. One of the beams was directed into a noncollinearly phase-matched optical parametric amplifier. The gauss pulses of 20 fs, 30 nJ at 620 nm were used as a pump. The second beam was focused onto a thin quartz cell with water to generate supercontinuum probe pulses. The pump and probe pulses were time-delayed with respect to each other using a computer-controlled delay stage. They were then attenuated, recombined, and focused onto the sample cell. The pump and probe light spots had the diameters of 300 and 120  $\mu\text{m}$ , respectively.

Experiments were carried out at 278 K in acetonitrile. The pump pulse operation frequency was 60 Hz, which is sufficiently low to exclude permanent bleaching of the sample due to photochemical processes in the sample. The relative polarizations of pump and probe beams were adjusted to  $54.7^\circ$  (magic angle) or in parallel and perpendicular polarizations, where indicated. After the sample, the supercontinuum was dispersed by a polychromator («Acton SP-300») and detected by CCD camera («Roper Scientific SPEC-10»). Transient spectra of absorbance changes  $\Delta A(t, \lambda)$  were recorded over the range of 380–800 nm. The measured spectra were corrected for group delay dispersion of the supercontinuum using the procedure described previously.<sup>8</sup>

**Table S1** Stokes shifts and emission maxima of P(V) porphyrins.

| Complex   | Chloroform       |                 | DMSO             |                 | Water            |                 |
|-----------|------------------|-----------------|------------------|-----------------|------------------|-----------------|
|           | $\lambda_F$ , nm | Stoke shift, nm | $\lambda_F$ , nm | Stoke shift, nm | $\lambda_F$ , nm | Stoke shift, nm |
| <b>2a</b> | 622, 677         | 109             | 625, 679         | 111             | hydrolysis       |                 |
| <b>3a</b> | 609, 664         | 106             | 614, 667         | 109             | 614, 667         | 112             |
| <b>4a</b> | 619, 672         | 107             | 618, 668         | 103             | 619, 671         | 107             |
| <b>5a</b> | 610, 663         | 106             | 614, 666         | 109             | 621, 673         | 115             |
| <b>2b</b> | 621, 676         | 110             | 624, 678         | 111             | hydrolysis       |                 |
| <b>3b</b> | 611, 663         | 107             | 612, 667         | 110             | 614, 667         | 113             |
| <b>4b</b> | 621, 671         | 107             | 617, 666         | 100             | 616, 667         | 104             |
| <b>5b</b> | 616, 669         | 110             | 618, 671         | 111             | 618, 674         | 117             |

**Table S2** Quantum yields of  $S_1-S_0$ ,  $S_1-CT$  and  $S_1-T_1$  processes calculated from transient absorption experiments.

| Complex   | Quantum yield of $S_1-S_0$ transition | Quantum yield of $S_1-CT$ transition | Quantum yield of $S_1-T_1$ transition |
|-----------|---------------------------------------|--------------------------------------|---------------------------------------|
| <b>2a</b> | 0.15                                  | -                                    | 0.86                                  |
| <b>2b</b> | 0.27                                  | -                                    | 0.75                                  |
| <b>3a</b> | 0.39                                  | -                                    | 0.61                                  |
| <b>3b</b> | <0.1                                  | -                                    | 0.95                                  |
| <b>4a</b> | 0.50                                  | 0.40                                 | 0.10                                  |
| <b>4b</b> | 0.44                                  | 0.39                                 | 0.20                                  |
| <b>5a</b> | 0.29                                  | -                                    | 0.70                                  |
| <b>5b</b> | 0.11                                  | -                                    | 0.89                                  |

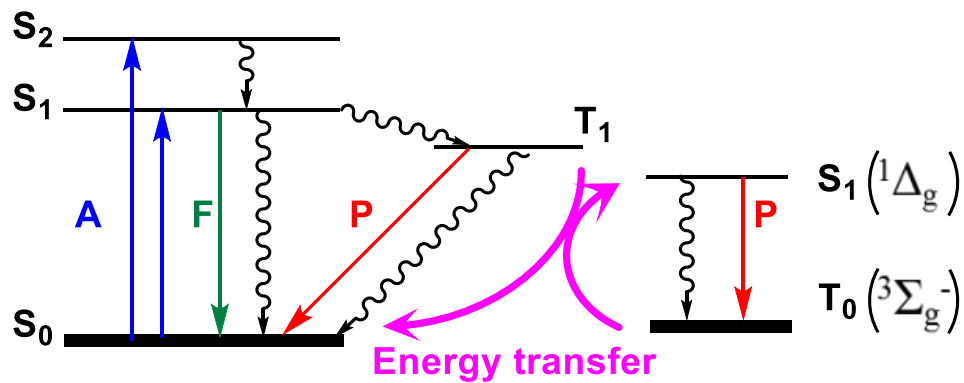

**Scheme S1** Jablonski diagram of energy transitions in photosensitive porphyrin; A – absorption, F – fluorescence, P - phosphorescence.



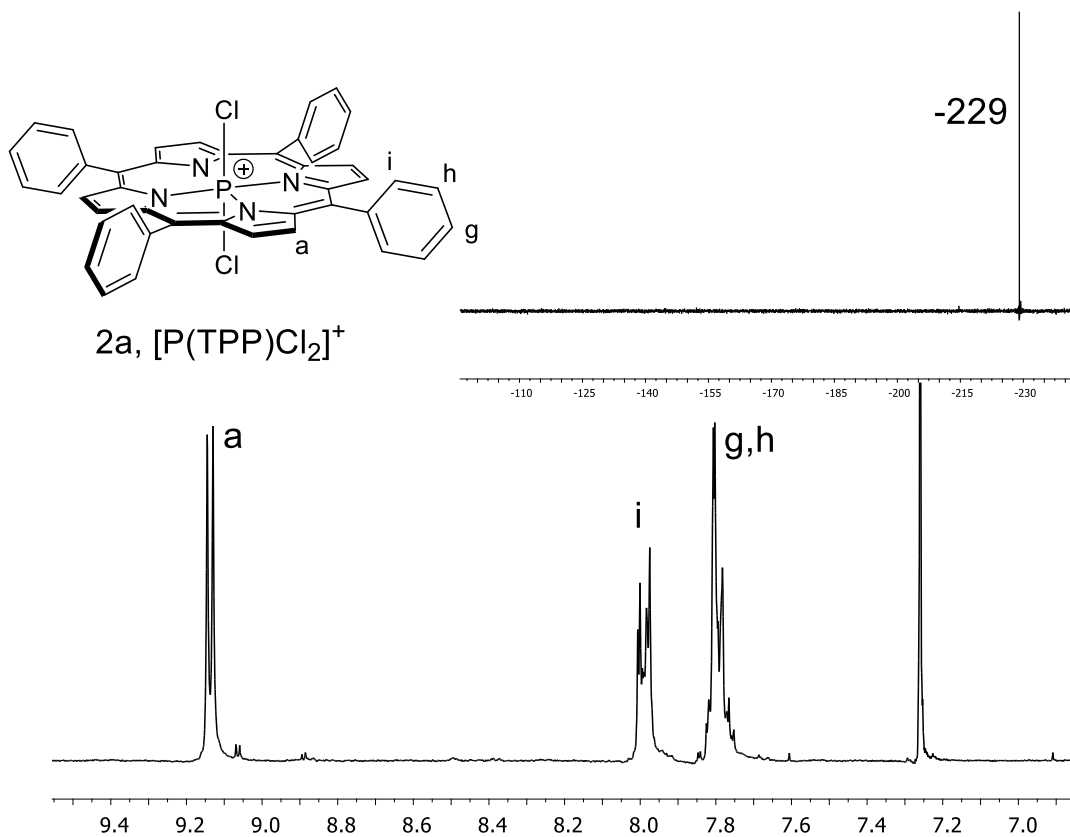

**Figure S2**  $^1H$ -NMR (bottom,  $CDCl_3$ , 300 MHz, 25 °C) and  $^{31}P$ -NMR (top right,  $CDCl_3$ , 121 MHz, 25 °C) spectra of **2a**.

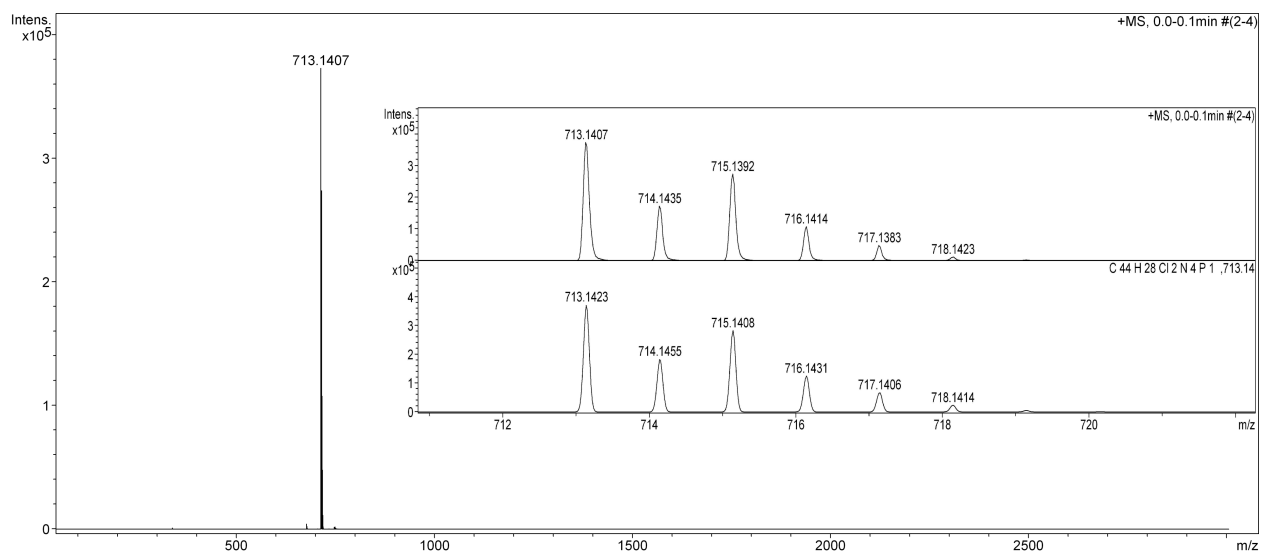

**Figure S3** HR-ESI TOF spectrum of **2a**.

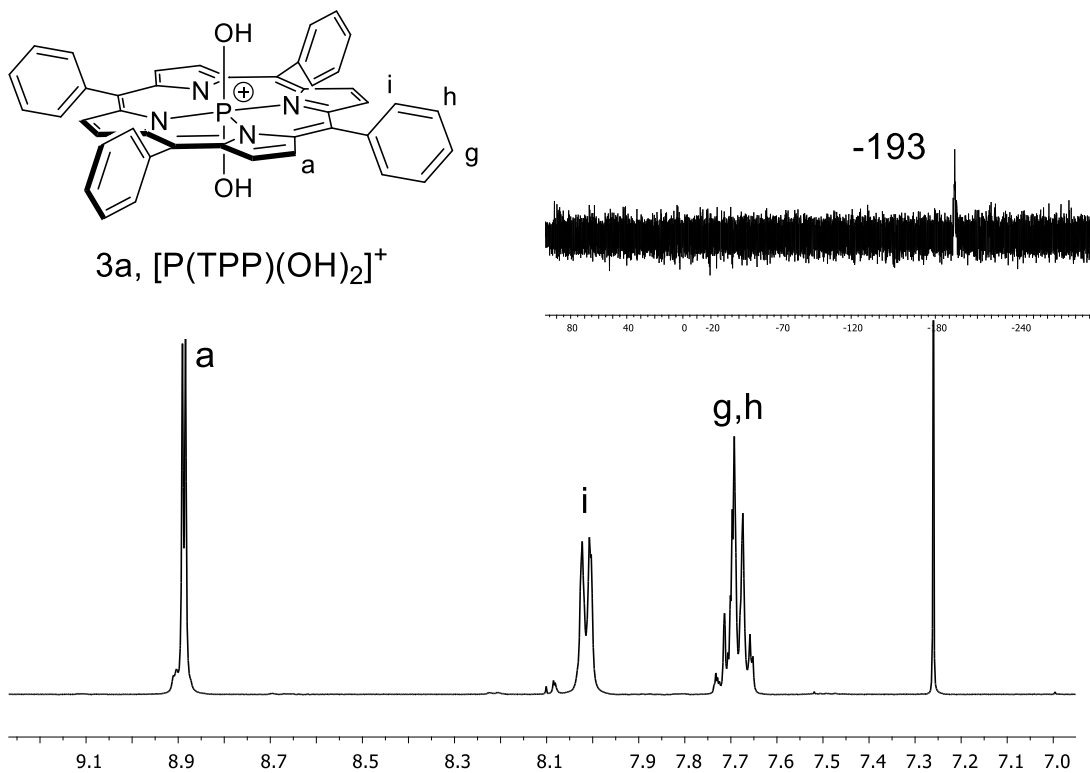

**Figure S4** <sup>1</sup>H-NMR (bottom, CDCl<sub>3</sub>, 400 MHz, 25 °C) and <sup>31</sup>P-NMR (top right, CDCl<sub>3</sub>, 162 MHz, 25 °C) spectra of **3a**.

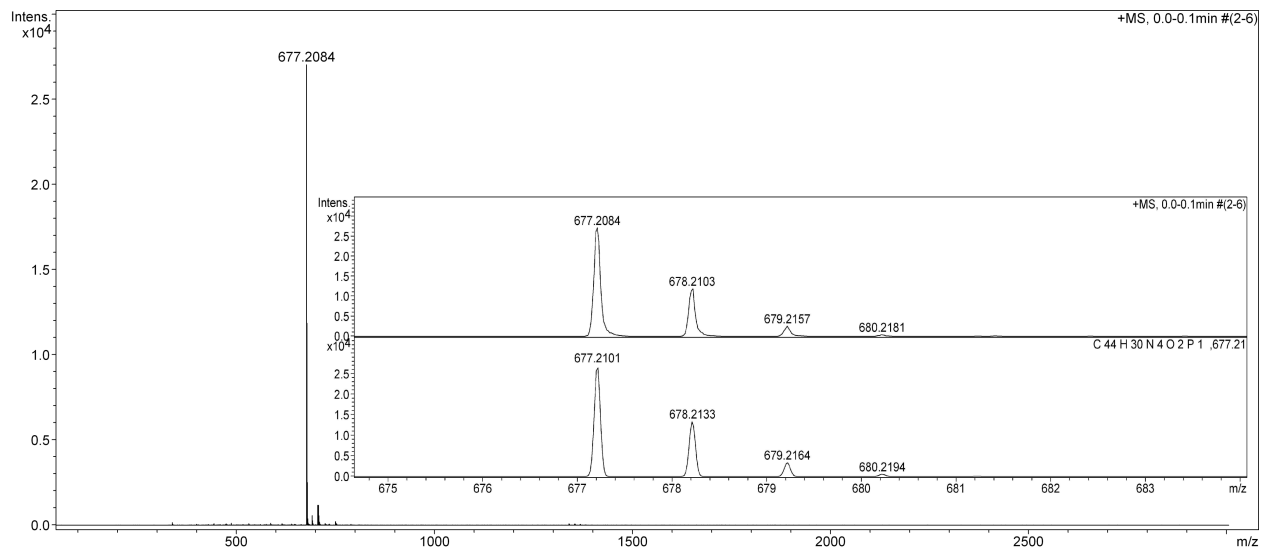

**Figure S5** HR-ESI TOF spectrum of **3a**.

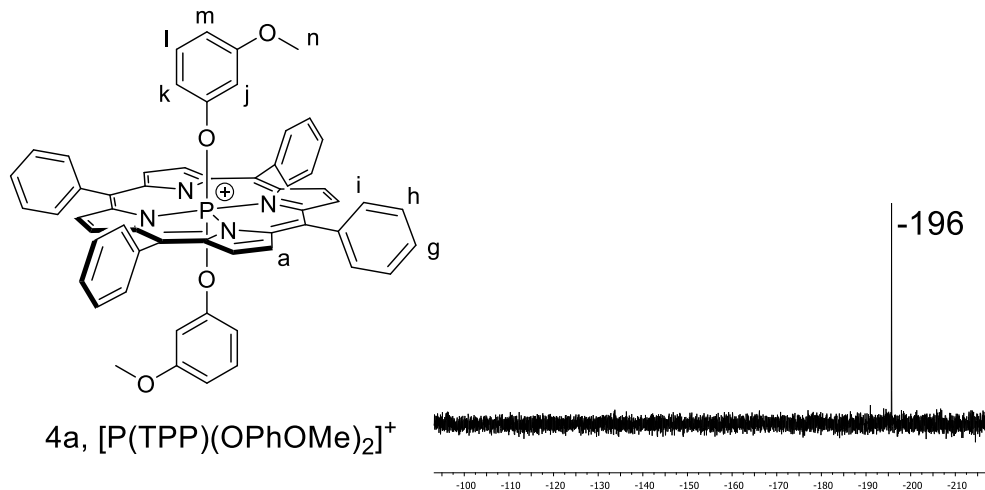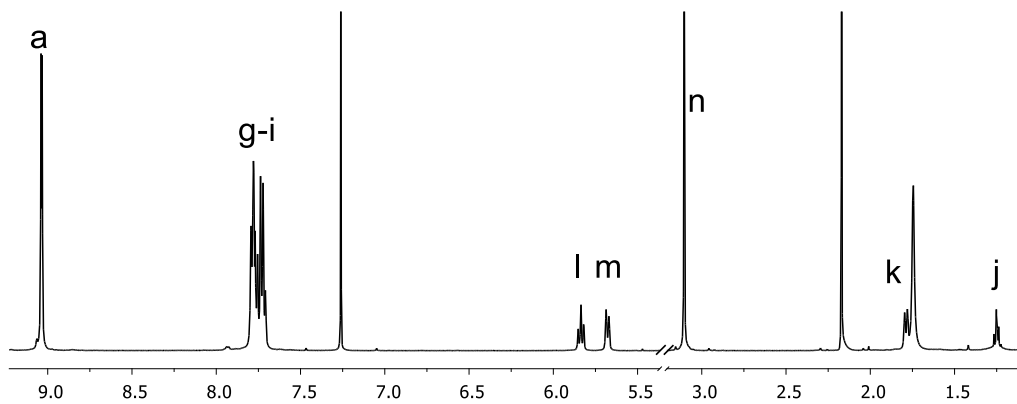

**Figure S6** <sup>1</sup>H-NMR (bottom, CDCl<sub>3</sub>, 500 MHz, 25 °C) and <sup>31</sup>P-NMR (top right, CDCl<sub>3</sub>, 121 MHz, 25 °C) spectra of **4a**.

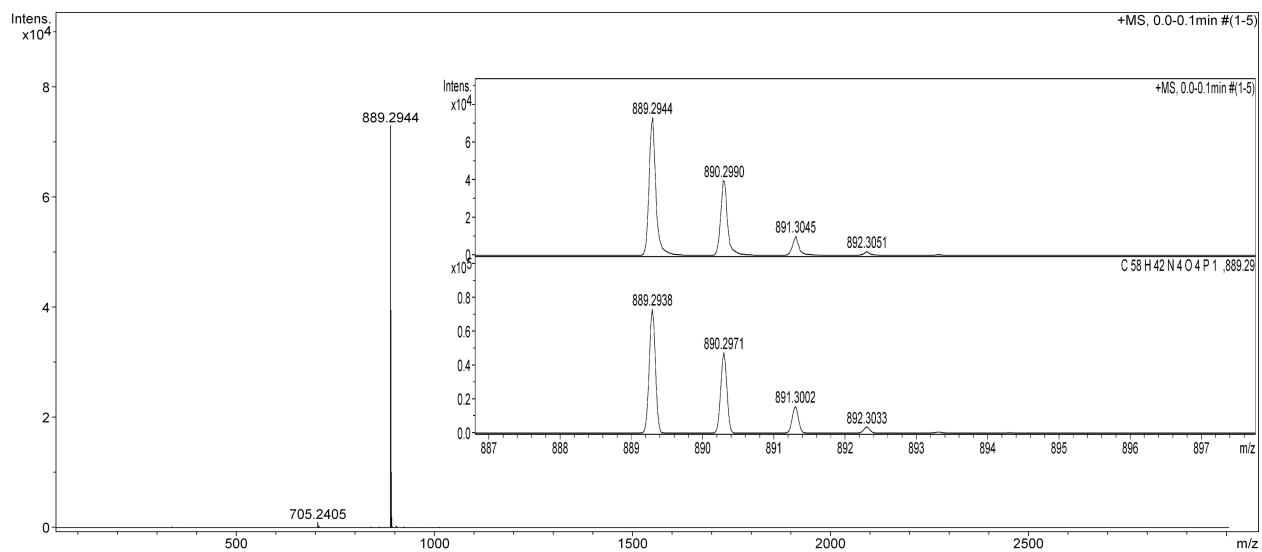

**Figure S7** HR-ESI TOF spectrum of **4a**.

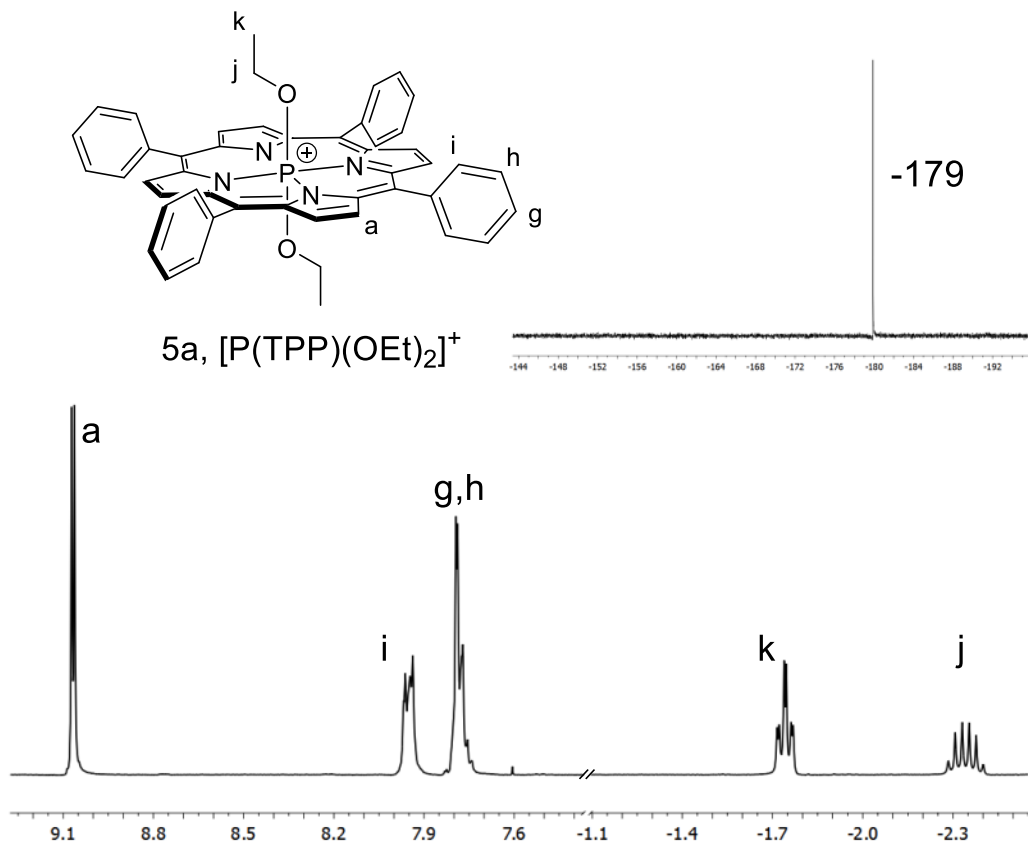

**Figure S8** <sup>1</sup>H NMR (bottom, CDCl<sub>3</sub>, 300 MHz, 25 °C) and <sup>31</sup>P NMR (top right, CDCl<sub>3</sub>, 162 MHz, 25 °C) spectra of the compound **5a**.

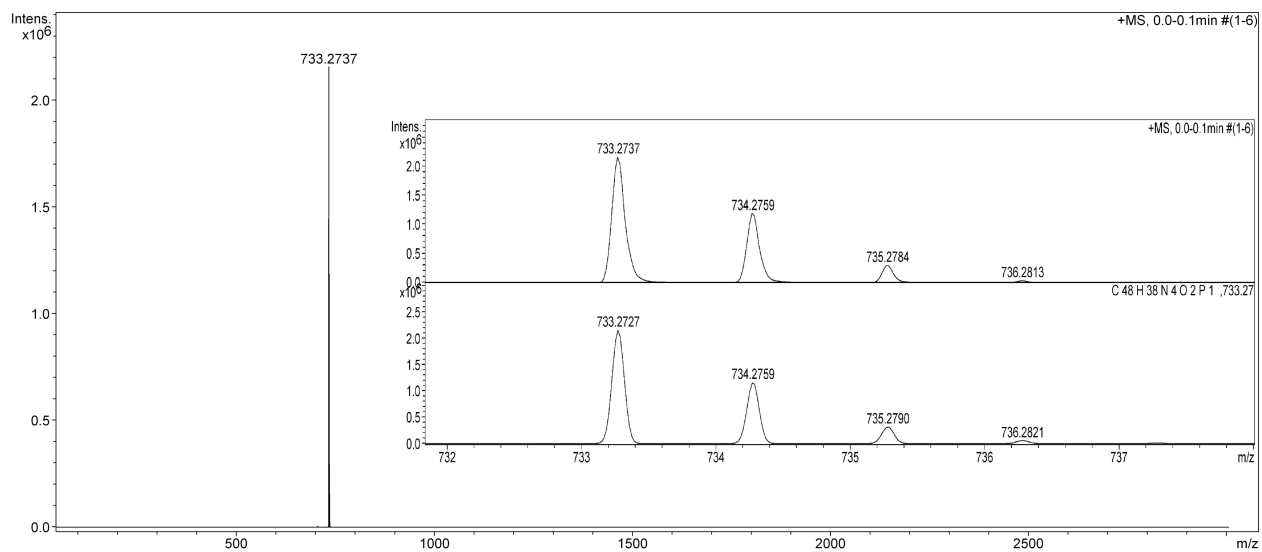

**Figure S9** HR-ESI TOF spectrum of the compound **5a**.

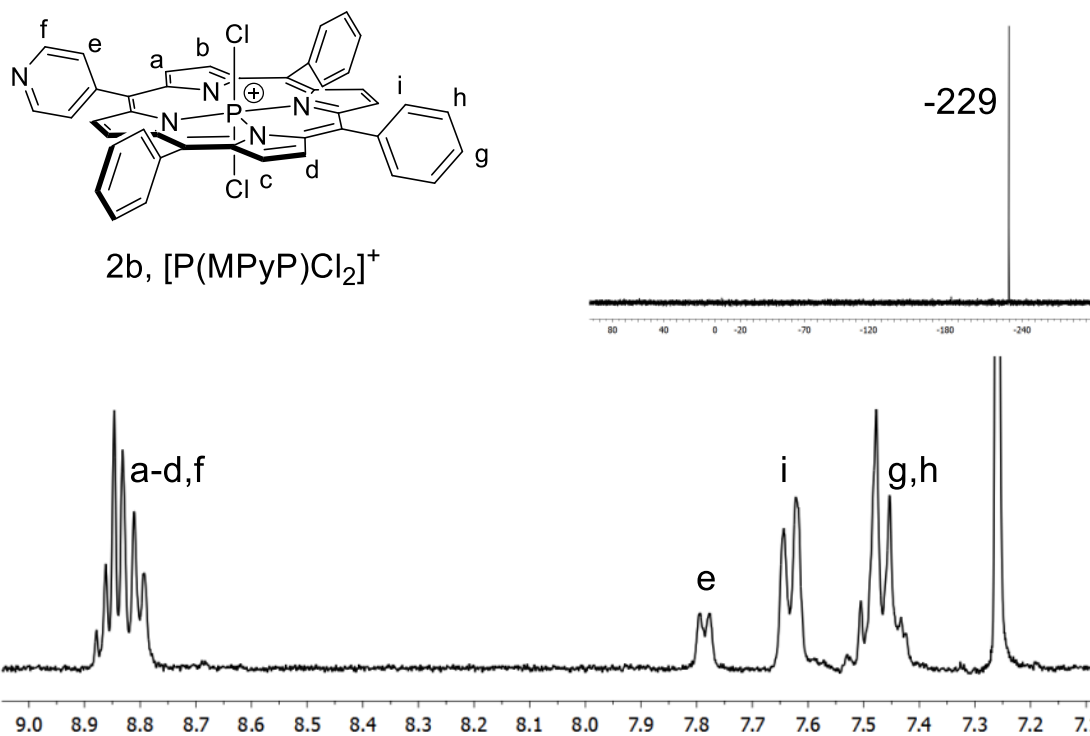

**Figure S10** <sup>1</sup>H-NMR (bottom, CDCl<sub>3</sub>, 300 MHz, 25 °C) and <sup>31</sup>P-NMR (top right, CDCl<sub>3</sub>, 121 MHz, 25 °C) spectra of **2b**.

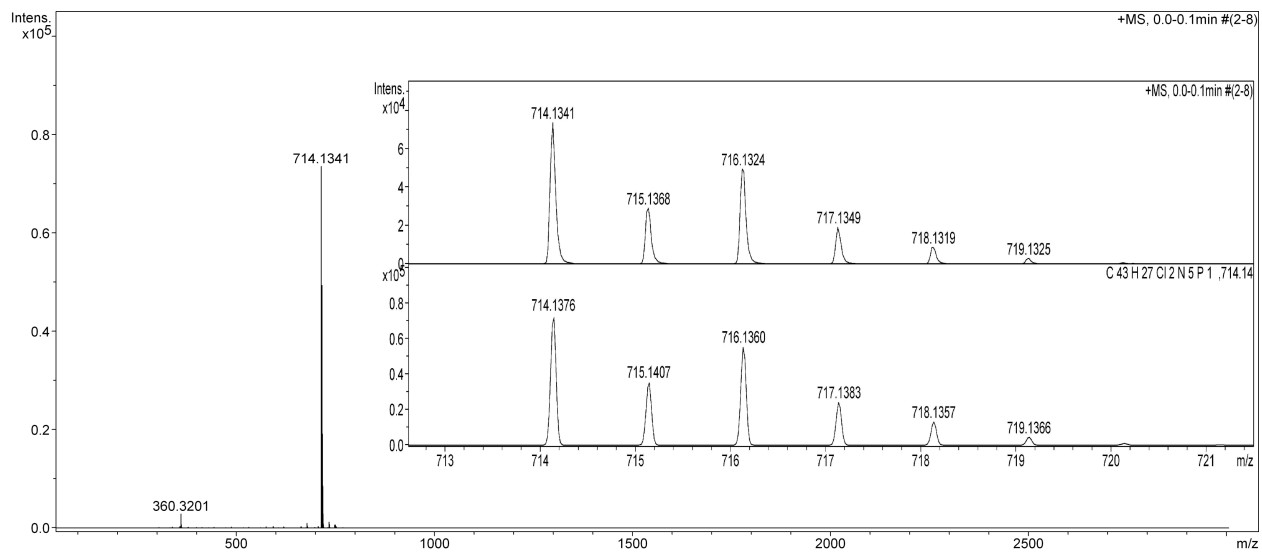

**Figure S11** HR-ESI TOF spectrum of **2b**.

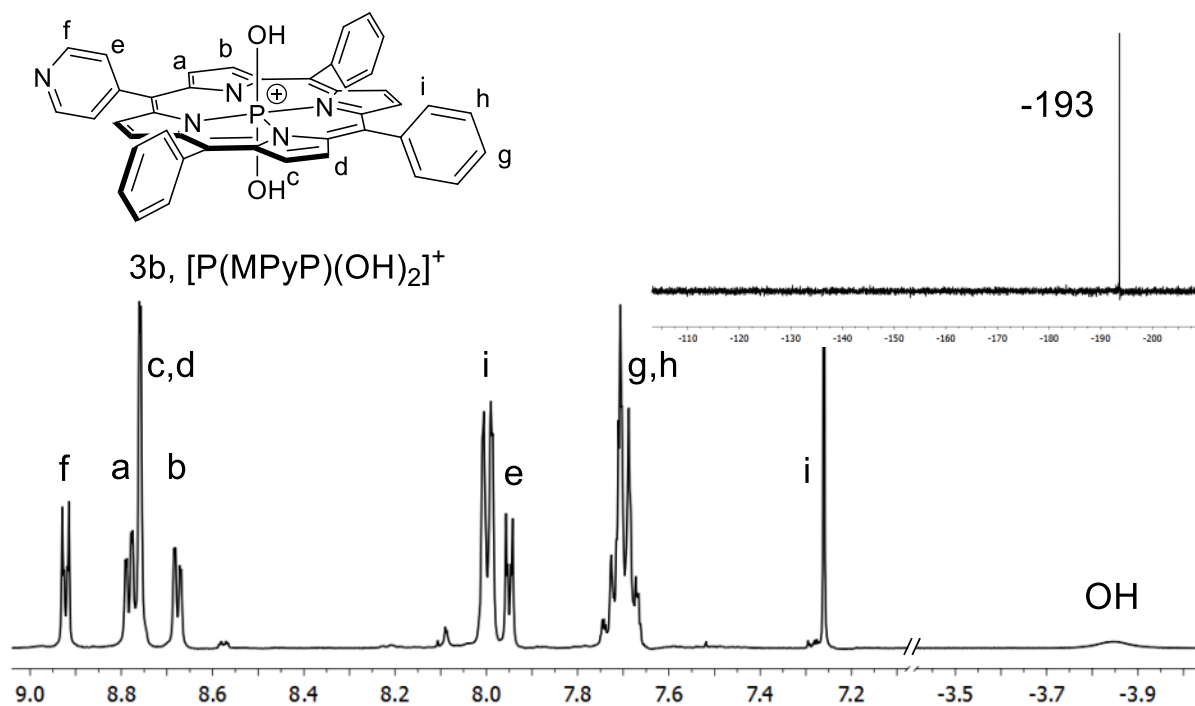

**Figure S12**  $^1H$ -NMR (bottom,  $CDCl_3$ , 400 MHz, 25 °C) and  $^{31}P$ -NMR (top right,  $CDCl_3$ , 162 MHz, 25 °C) spectra of **3b**.

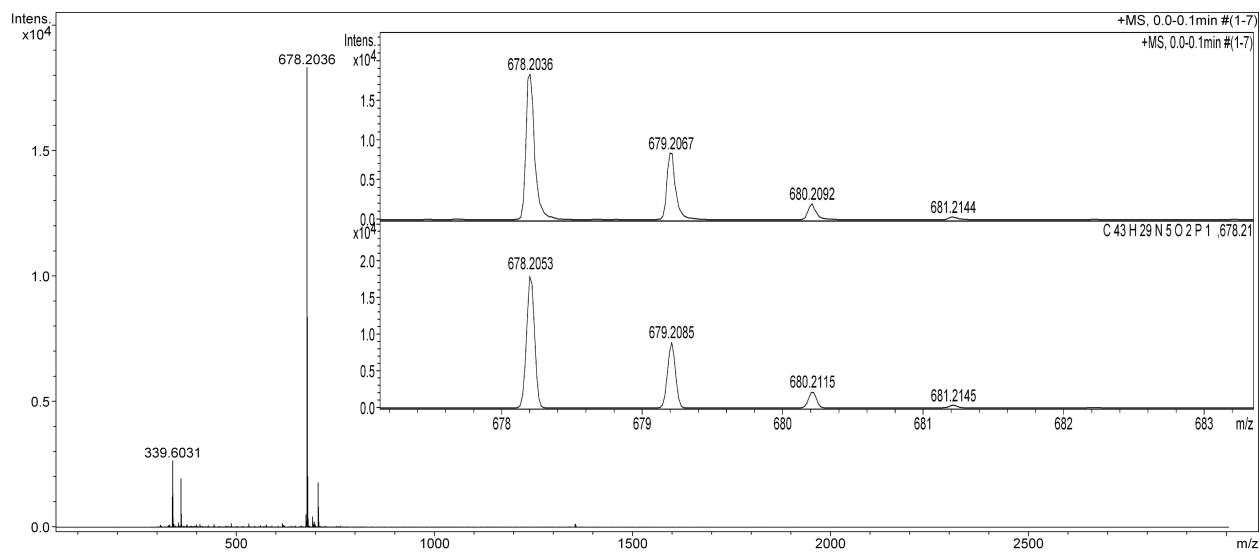

**Figure S13** HR-ESI TOF spectrum of **3b**.

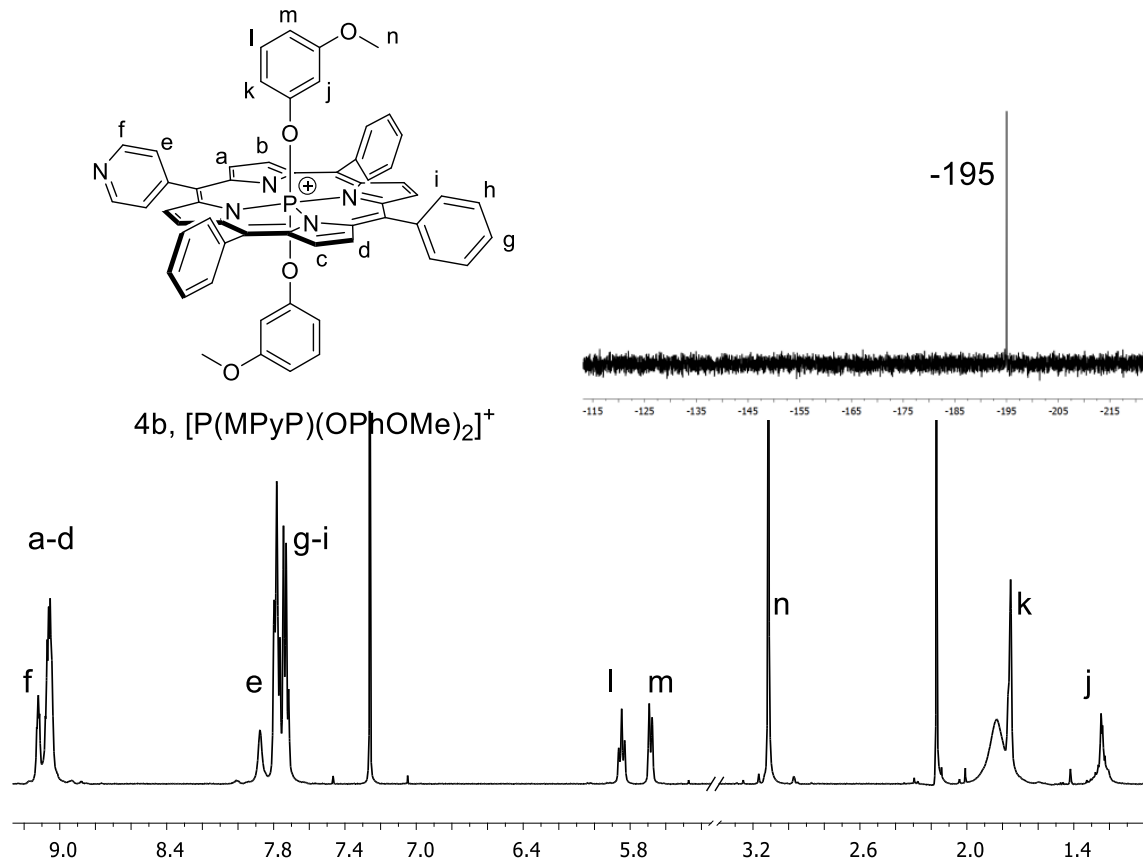

**Figure S14** <sup>1</sup>H-NMR (bottom, CDCl<sub>3</sub>, 400 MHz, 25 °C) and <sup>31</sup>P-NMR (top right, CDCl<sub>3</sub>, 162 MHz, 25 °C) spectra of **4b**.

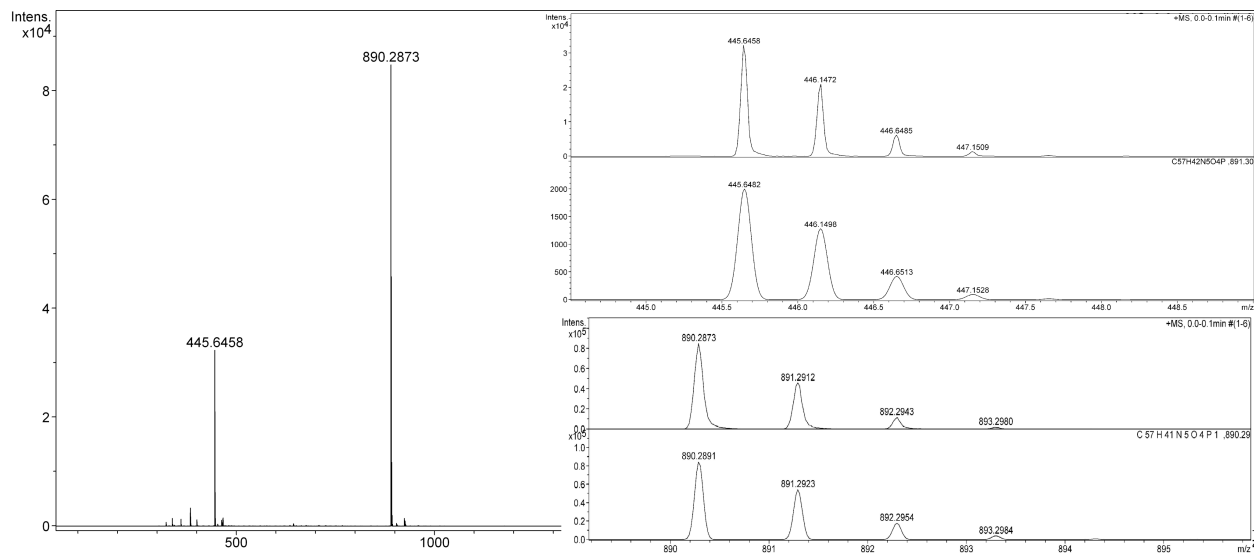

**Figure S15** HR-ESI TOF spectrum of **4b**.

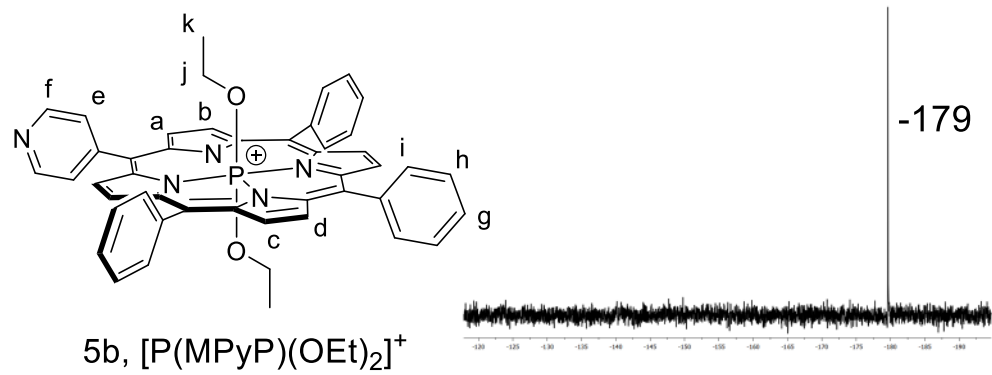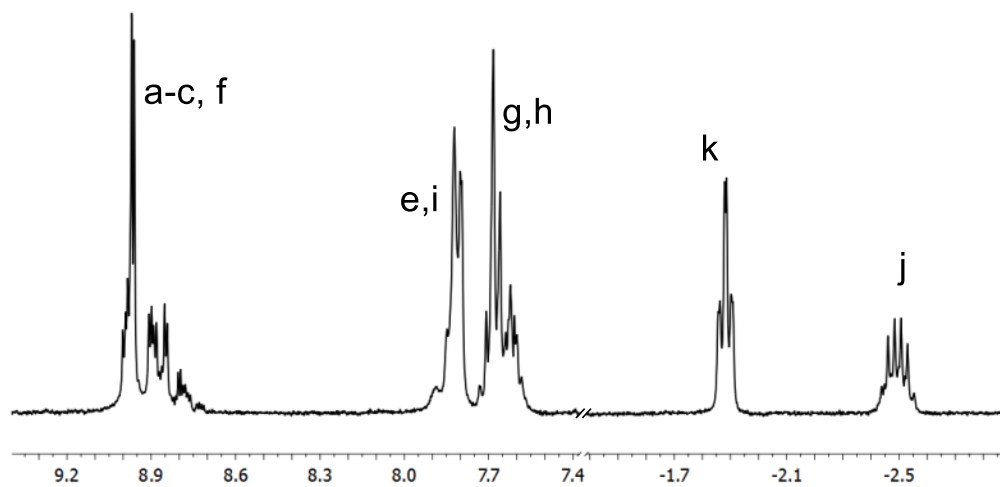

**Figure S16**  $^1H$  NMR (bottom,  $CDCl_3+DMSO_{d6}$ , 300 MHz, 25 °C) and  $^{31}P$  NMR (top right,  $CDCl_3+DMSO_{d6}$ , 162 MHz, 25 °C) spectra of the compound **5b**.

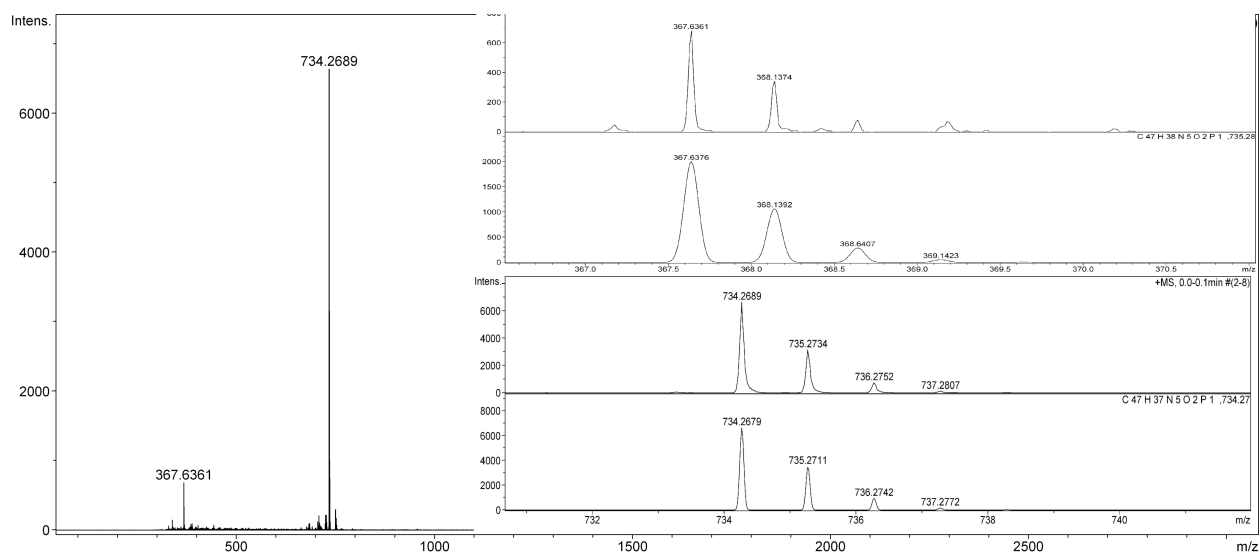

**Figure S17** HR-ESI TOF spectrum of the compound **5b**.



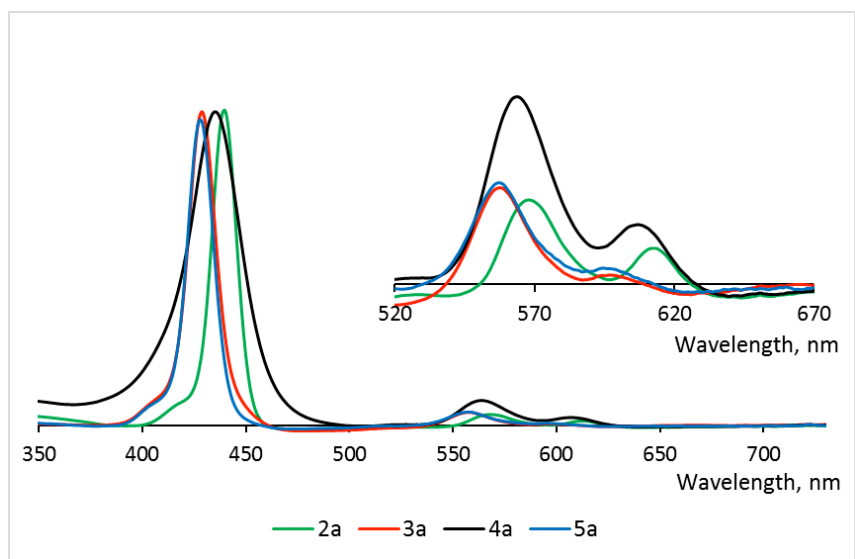

**Figure S18** Normalized UV-Vis spectra of compounds **2a-5a** in  $\text{CHCl}_3$ .

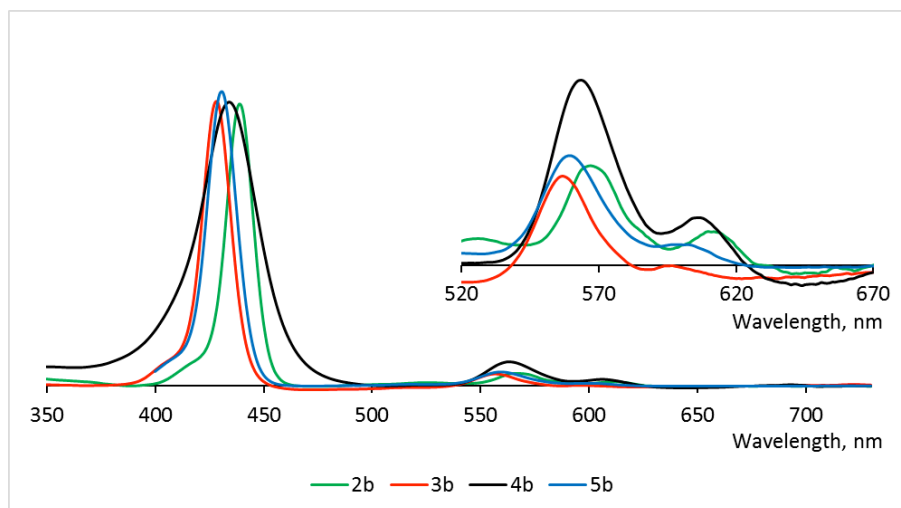

**Figure S19** Normalized UV-Vis spectra of compounds **2b-5b** in  $\text{CHCl}_3$ .

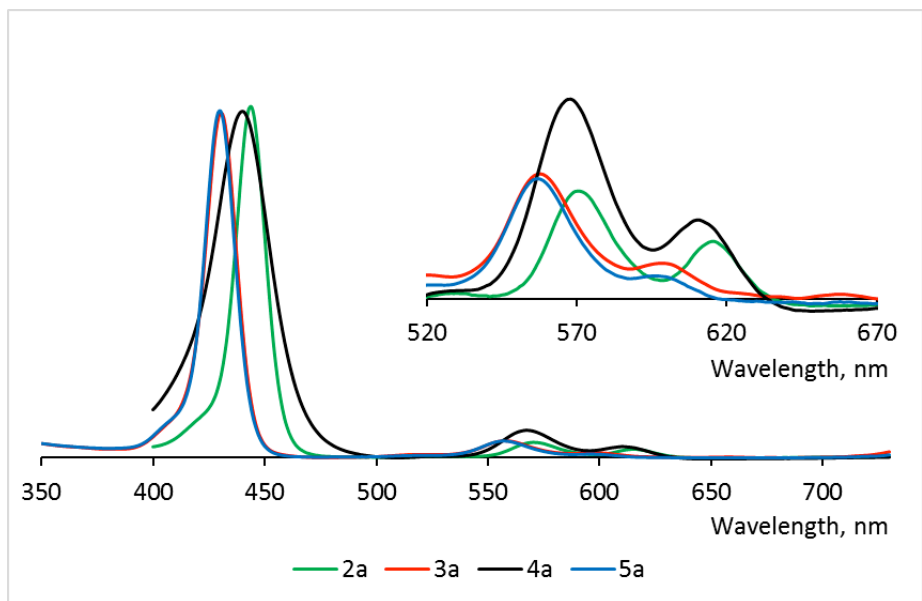

**Figure S20** Normalized UV-Vis spectra of compounds **2a-5a** in DMSO.

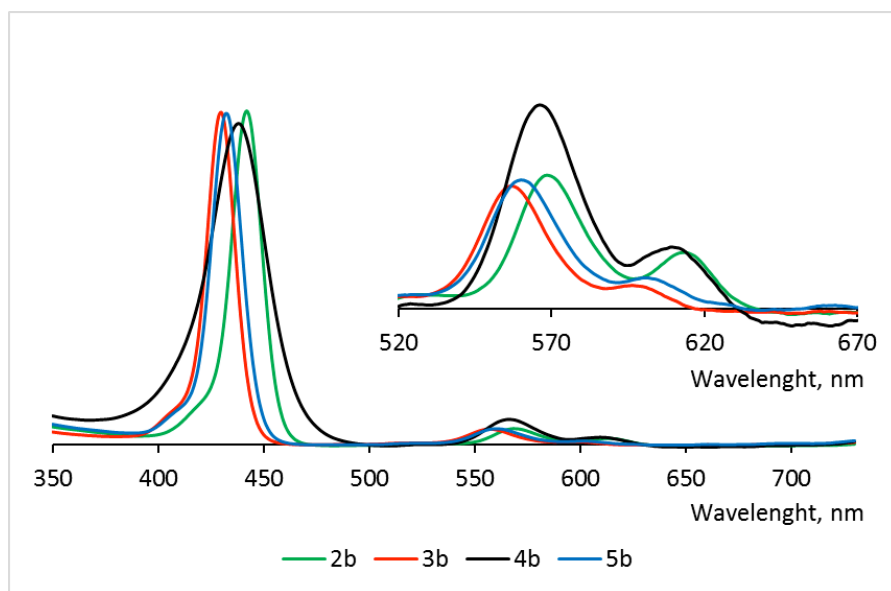

**Figure S21** Normalized UV-Vis spectra of compounds **2b-5b** in DMSO.

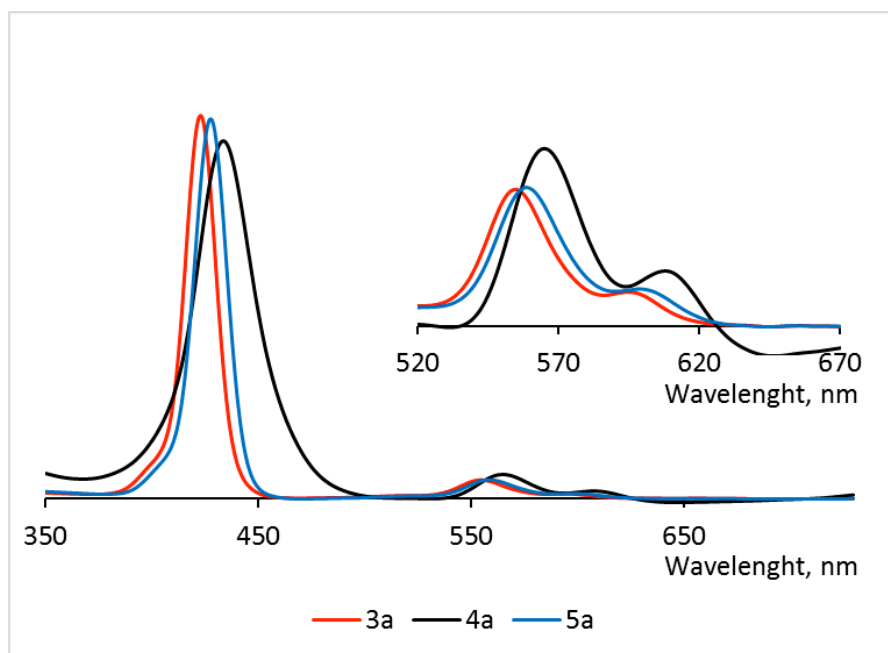

**Figure S22** Normalized UV-Vis spectra of compounds **3a-5a** in water.

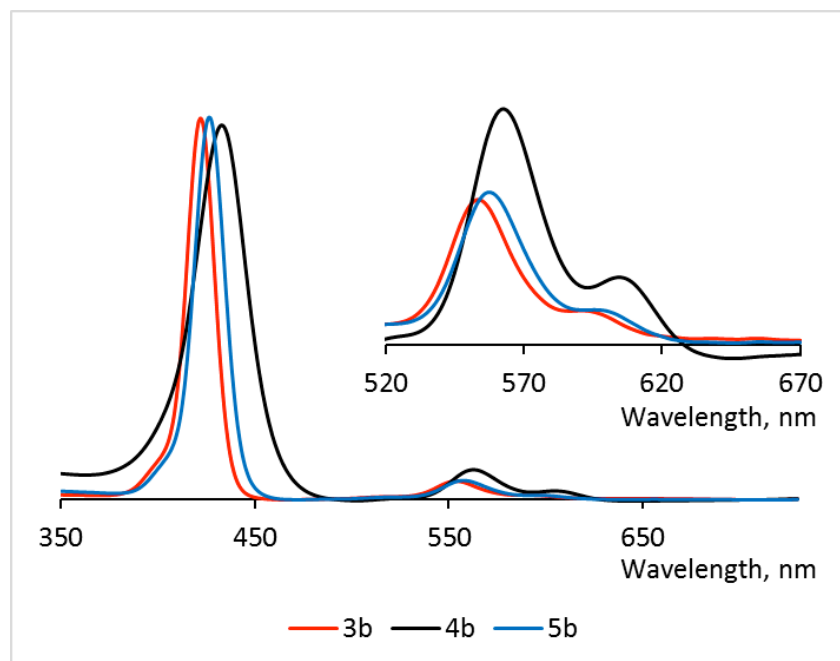

**Figure S23** Normalized UV-Vis spectra of compounds **3b-5b** in water.

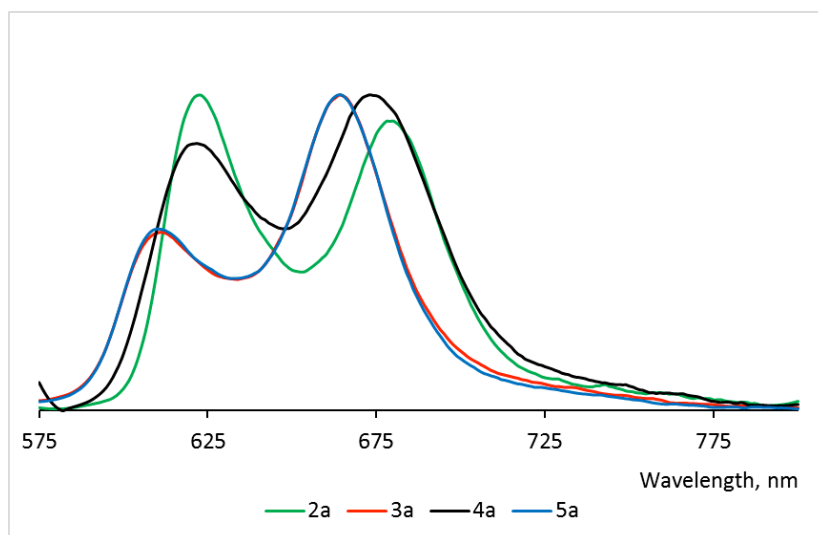

**Figure S24** Normalized fluorescence spectra ( $\lambda_{\text{ex}} = 550 \text{ nm}$ ) of compounds **2a-5a** in CHCl<sub>3</sub>.

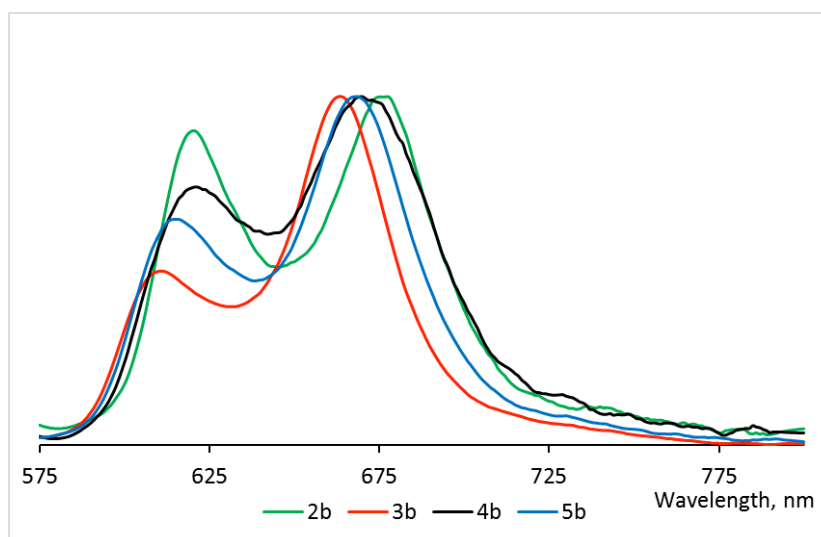

**Figure S25** Normalized fluorescence spectra ( $\lambda_{\text{ex}} = 550 \text{ nm}$ ) of compounds **2b-5b** in CHCl<sub>3</sub>.

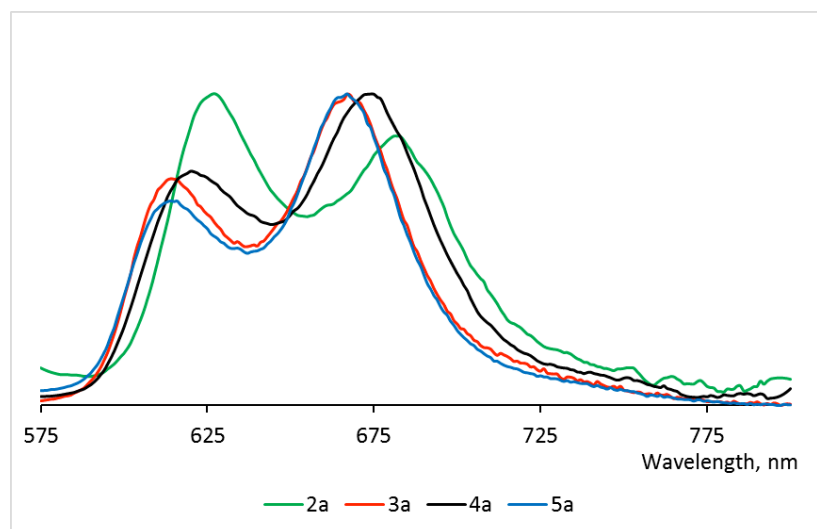

**Figure S26** Normalized fluorescence spectra ( $\lambda_{\text{ex}} = 550 \text{ nm}$ ) of compounds **2a-5a** in DMSO.

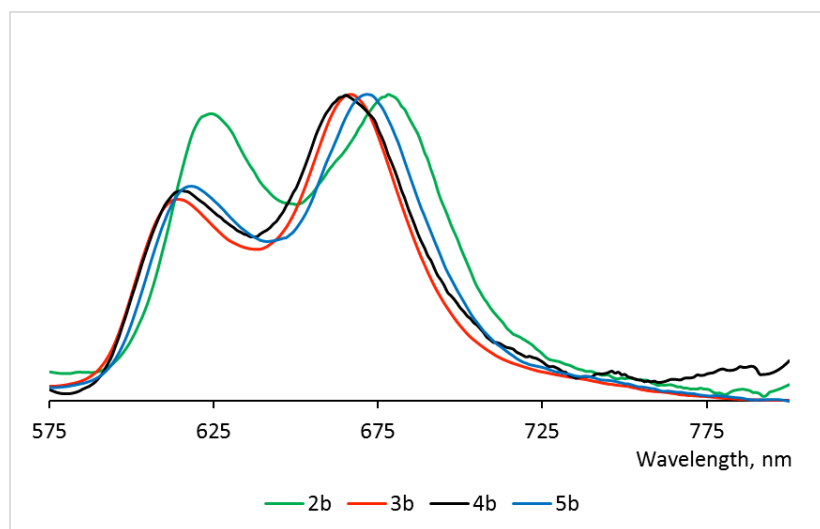

**Figure S27** Normalized fluorescence spectra ( $\lambda_{\text{ex}} = 550 \text{ nm}$ ) of compounds **2b-5b** in DMSO.

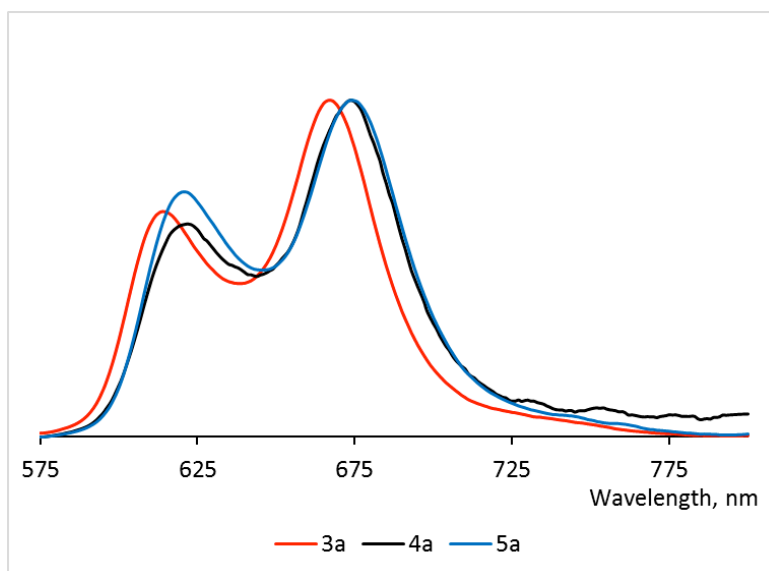

**Figure S28** Normalized fluorescence spectra ( $\lambda_{\text{ex}} = 550 \text{ nm}$ ) of compounds **3a-5a** in water.

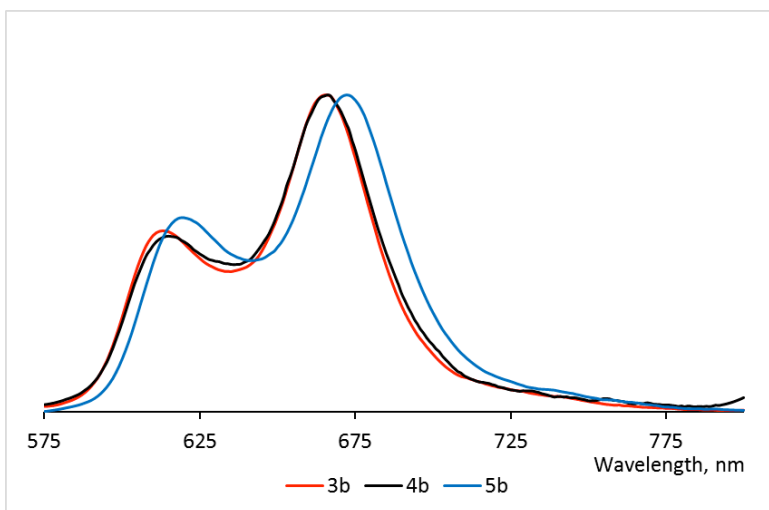

**Figure S29** Normalized fluorescence spectra ( $\lambda_{\text{ex}} = 550 \text{ nm}$ ) of compounds **3b-5b** in water.

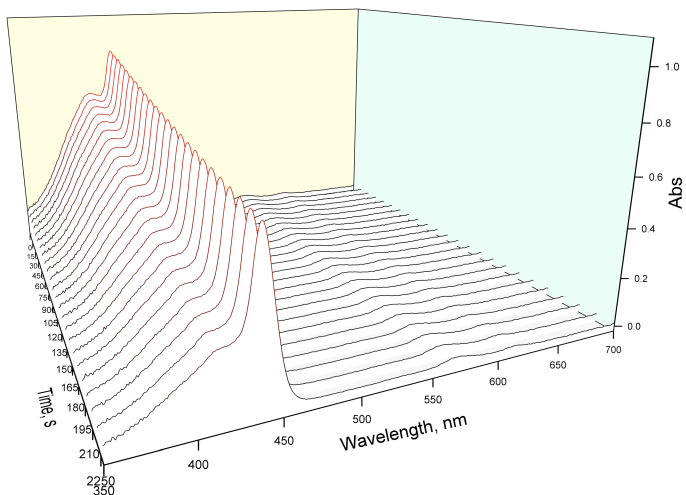

**Figure S30** Degradation of DPBF in the chloroform solution of **2a**.

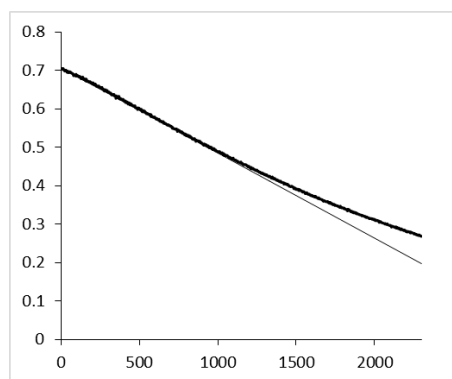

**Figure S31** Degradation of DPBF in the chloroform solution of **2a** – plot of DPBF peak (415 nm) vs time.

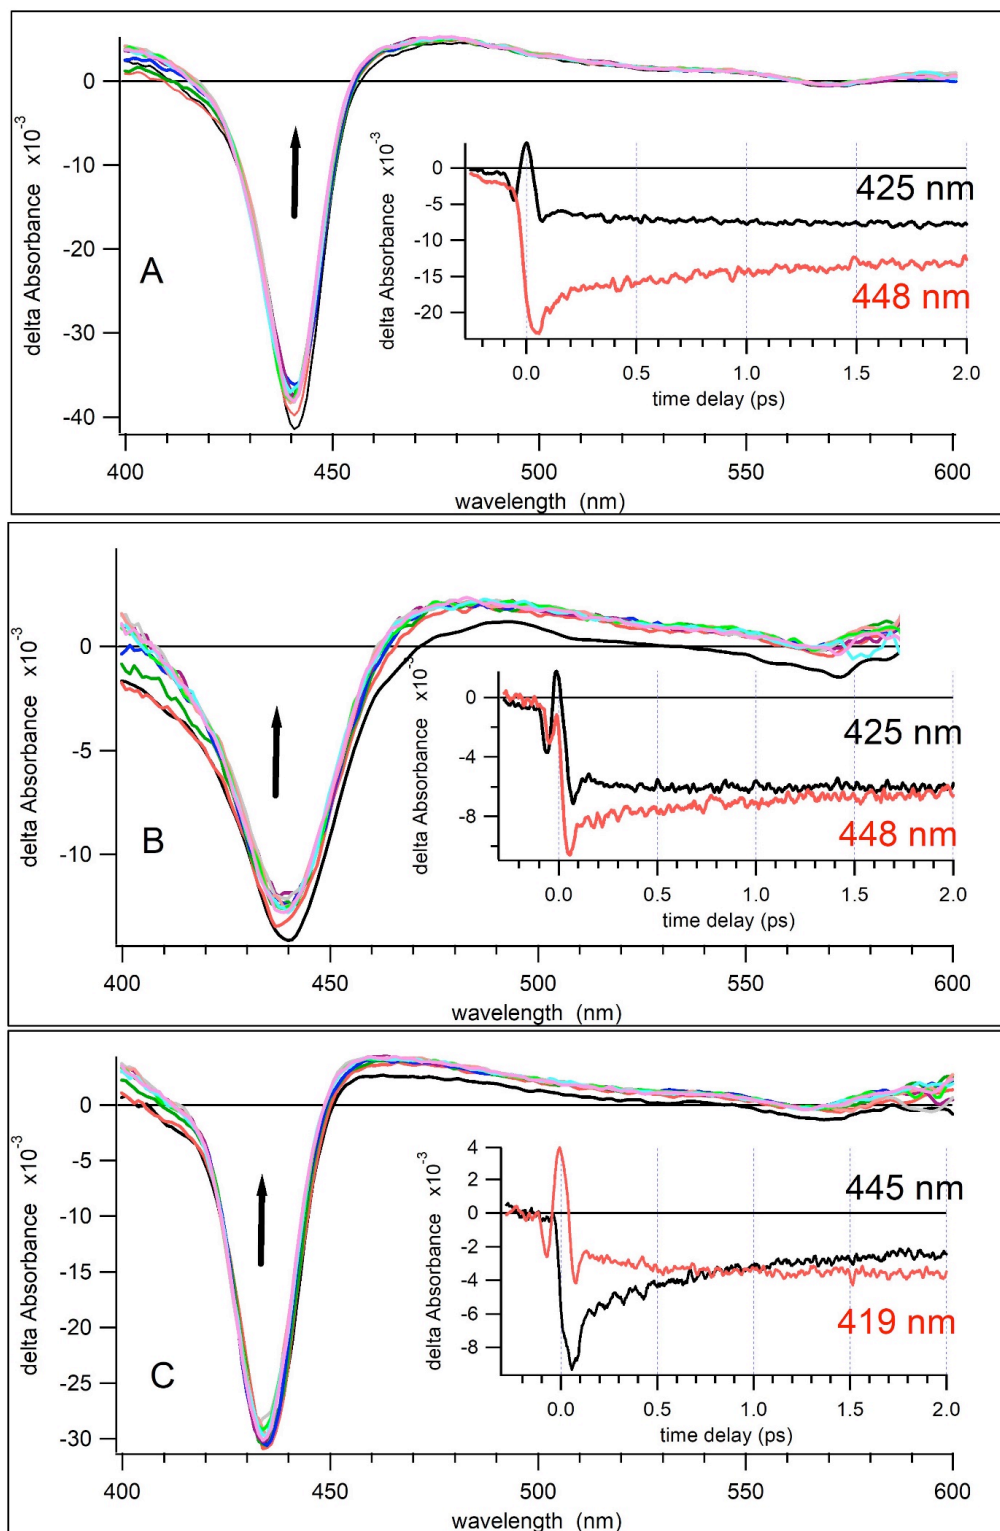

**Figure S32** Transient spectra at early time delays. Time delays are shown between 70 fs and 205 fs with the step of 15 fs. Arrows show the rise of time delay. Inserts demonstrates transient traces. (A) - complex **2a**. (B) complex **4a**. (C) complex **5a**.



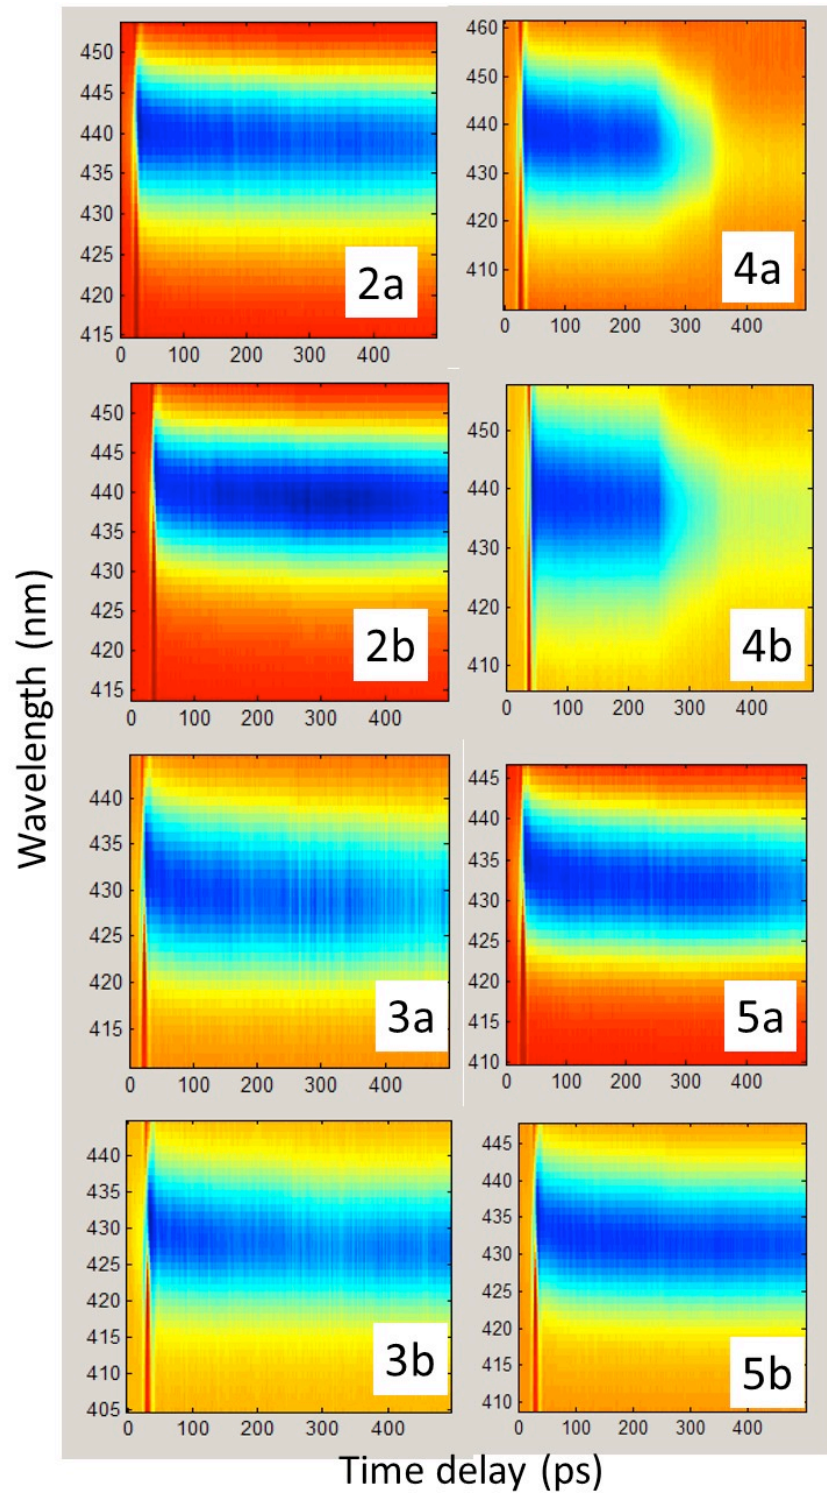

**Figure S33** 2D maps of transient spectra changes vs time delay.

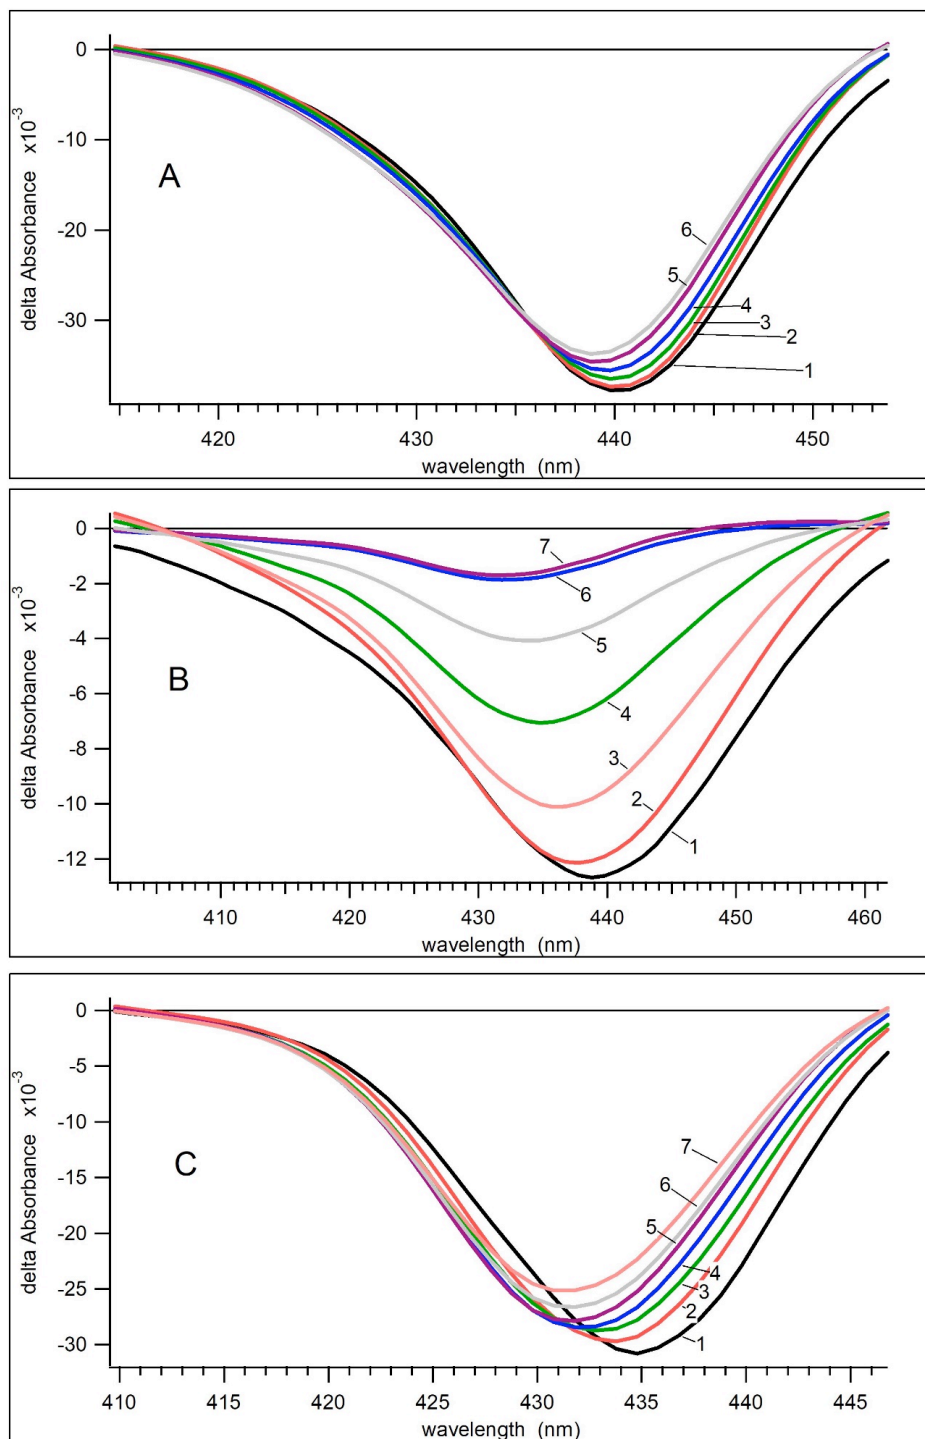

**Figure S34** Transient spectra in the region of the Soret band vs time delay. A. **2a**. Time delays: 1) 100 fs; 2) 300 fs; 4) 500 fs; 5) 700 fs; 6) 15 ps; 7) 200 ps. B. **4a**. Time delays: 1) 100 fs; 2) 900 fs; 3) 5 ps; 4) 15 ps; 5) 45 ps; 6) 200 ps; 7) 400 ps. C. **5a**. Time delays: 1) 100 fs; 2) 300 fs; 3) 500 fs; 4) 900 fs; 5) 15 ps; 6) 200 ps; 7) 400 ps.

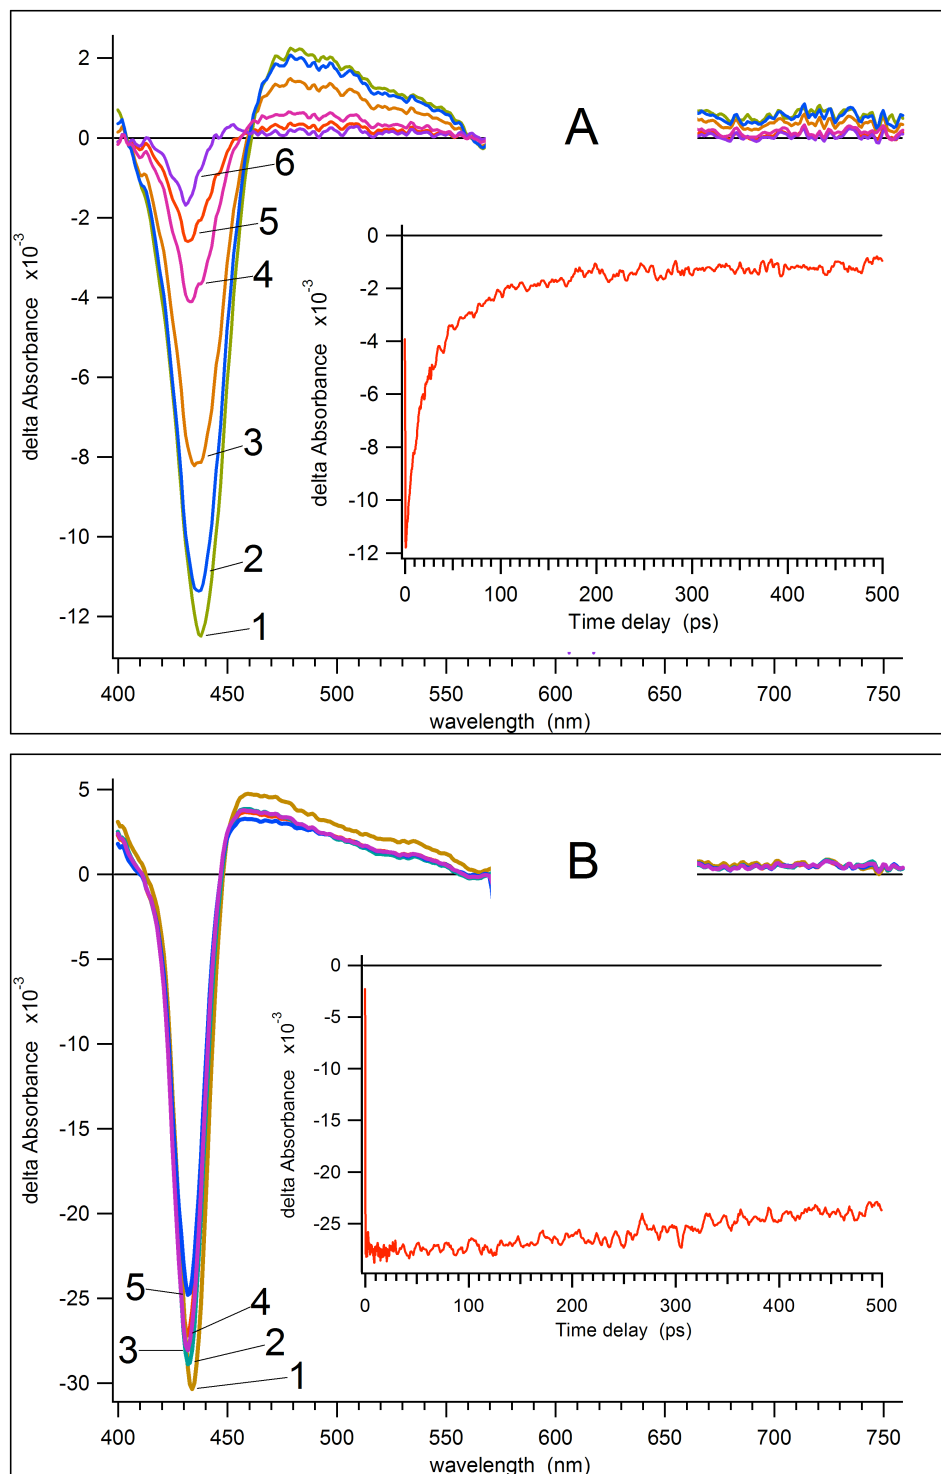

**Figure S35** Transient absorption spectra of complexes **4a** (A) and **5a** (B) in acetonitrile ( $\lambda_{\text{ex}} = 620$  nm). Time delay (A): 1) 120 fs; 2) 2 ps; 3) 10 ps; 4) 45 ps; 5) 100 ps; 6) 450 ps; time delay (B): 1) 120 fs; 2) 2 ps; 3) 45 ps; 4) 100 ps; 5) 450 ps. Transient kinetics decay are presented in inserts.

### Intramolecular energy transitions without CT state for compounds 2, 3 and 5.

Kinetics of the state population.

$$\frac{dS_1}{dt} = -(k_1 + k_2)[S_1]$$

$$\frac{dT_1}{dt} = k_2[S_1]$$

$$\frac{dS_0}{dt} = k_1[S_1]$$

We neglect the transition of  $T_1 \rightarrow S_0$  suggesting that it is slow.

$$[S_1](t=0) = C[1]$$

$$[S_1](t) = C[1]e^{-(k_1+k_2)t}$$

$$[T_1] = \frac{k_2}{k_2 + k_1} C[1](1 - e^{-(k_1+k_2)t})$$

Bleaching is directly proportional of the sum  $S_1+T_1$

$$BL = \frac{k_1}{k_2 + k_1} e^{-(k_1+k_2)t} + \frac{k_2}{k_1 + k_2}$$

Fitting

$$Y_0 + A_1 e^{(-t/\tau_1)} :$$

$$\frac{1}{\tau_1} = k_1 + k_2$$

$$A_1 = \frac{k_1}{k_1 + k_2}$$

$$Y_0 = \frac{k_2}{k_1 + k_2}$$

#### Intramolecular energy transitions with CT state for compounds 4.

Kinetics of the state population.

$$\frac{dS_1}{dt} = -(k_1 + k_2 + k_3)[S_1]$$

$$\frac{dCT}{dt} = k_2[S_1] - k_4[CT]$$

$$\frac{dT_1}{dt} = k_3[S_1]$$

$$\frac{dS_0}{dt} = k_1[S_1] + k_4[CT]$$

We neglect the transition of T1 → S0 suggesting that it is slow.

$$[S_1](t=0) = C[1]$$

$$[S_1] = C[1]e^{-(k_1+k_2+k_3)t}$$

$$[CT] = \frac{e^{-k_4t}(-1 + e^{-(k_1+k_2+k_3)t+k_4t})k_1C[1]}{k_1 + k_2 + k_3 - k_4}$$

$$[T_1] = \frac{(-1 + e^{-(k_1+k_2+k_3)t})k_3C[1]}{k_1 + k_2 + k_3}$$

Bleaching is directly proportional of the sum S<sub>1</sub>+CT+T<sub>1</sub>

$$BL = \left\{ e^{-(k_1+k_2+k_3)t} - \frac{e^{-k_4t}(-1 + e^{-(k_1+k_2+k_3)t+k_4t})k_1}{k_1 + k_2 + k_3 - k_4} - \frac{(-1 + e^{-(k_1+k_2+k_3)t})k_3}{k_1 + k_2 + k_3} \right\} C[1]$$

$$\left\{ e^{-(k_1+k_2+k_3)t} \left( 1 - \frac{k_1}{k_1 + k_2 + k_3 - k_4} - \frac{k_3}{k_1 + k_2 + k_3} \right) + \frac{k_1 e^{-k_4t}}{k_1 + k_2 + k_3 - k_4} + \frac{k_3}{k_1 + k_2 + k_3} \right\} C[1]$$

Fitting

$$Y_0 + A_1 e^{(-t/\tau_1)} + A_2 e^{(-t/\tau_2)}$$

$$Y_0 = \frac{k_3}{k_1 + k_2 + k_3}$$

$$A_1 = 1 - \frac{k_1}{k_1 + k_2 + k_3 - k_4} - \frac{k_3}{k_1 + k_2 + k_3}$$

$$\frac{1}{\tau_1} = k_1 + k_2 + k_3$$

$$A_2 = \frac{k_1}{k_1 + k_2 + k_3 - k_4}$$

$$\frac{1}{\tau_2} = k_4$$

## Calculated transient absorption spectra data for complexes 2-5.

### *Compound 2a.*

$$Y_0 = 0.86433 \pm 0.0688$$

$$A = 0.15253 \pm 0.0664$$

$$\tau^{-1} = 0.0011486 \pm 0.000696 \text{ ps}^{-1}$$

### *Compound 2b.*

$$Y_0 = 0.7493 \pm 0.074$$

$$A = 0.27382 \pm 0.0731$$

$$\tau^{-1} = 0.00084358 \pm 0.000276 \text{ ps}^{-1}$$

### *Compound 3a.*

$$Y_0 = 0.61358 \pm 0.0582$$

$$A = 0.39085 \pm 0.0569$$

$$\tau^{-1} = 0.0014321 \pm 0.000289 \text{ ps}^{-1}$$

### *Compound 3b.*

$$Y_0 = 0.94673 \pm 0.176$$

$$A = 2.498\text{e-}16 \pm 0.174$$

### *Compound 4a.*

$$Y_0 = 0.10385 \pm 0.000781$$

$$A_1 = 0.50074 \pm 0.00887$$

$$\tau_1^{-1} = 0.093341 \pm 0.00191 \text{ ps}^{-1}$$

$$A_2 = 0.40357 \pm 0.00896$$

$$\tau_2^{-1} = 0.017502 \pm 0.000402 \text{ ps}^{-1}$$

### *Compound 4b.*

$$Y_0 = 0.20001 \pm 0.00182$$

$$A_1 = 0.43637 \pm 0.028$$

$$\tau_1^{-1} = 0.17928 \pm 0.0116 \text{ ps}^{-1}$$

$$A_2 = 0.39398 \pm 0.0285$$

$$\tau_2^{-1} = 0.034515 \pm 0.00269 \text{ ps}^{-1}$$

### *Compound 5a.*

$$Y_0 = 0.7 \pm 0.0861$$

$$A = 0.28576 \pm 0.0849$$

$$\tau^{-1} = 0.0011498 \pm 0.000443 \text{ ps}^{-1}$$

### *Compound 5b.*

$$Y_0 = 0.88996 \pm 0.0296$$

$$A = 0.11261 \pm 0.0277$$

$$\tau^{-1} = 0.0015286 \pm 0.000594 \text{ ps}^{-1}$$

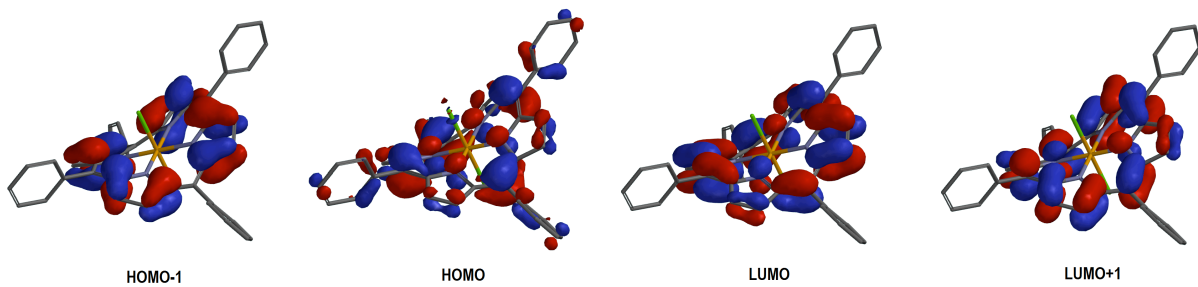

**Figure S36** Calculated molecular orbitals of **2a**.

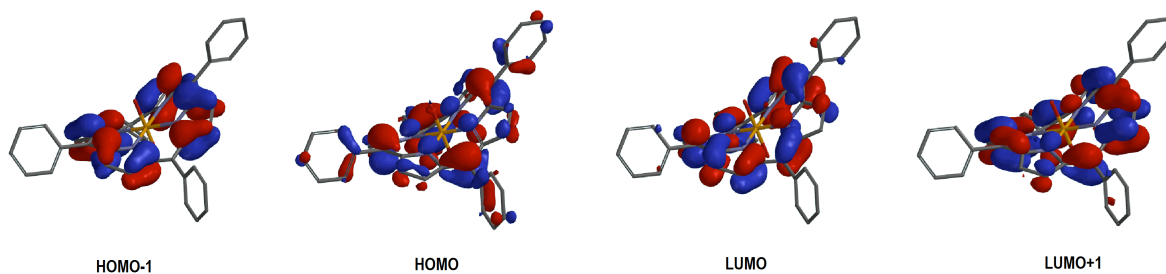

**Figure S37** Calculated molecular orbitals of **3a**.

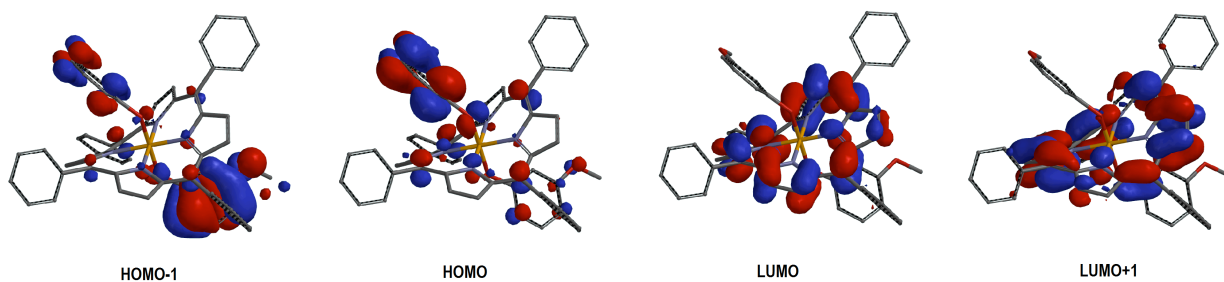

**Figure S38** Calculated molecular orbitals of **4a**.

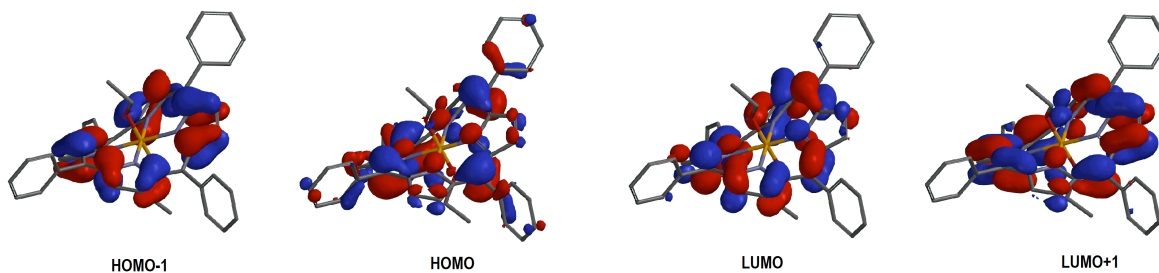

**Figure S39** Calculated molecular orbitals of **5a**.

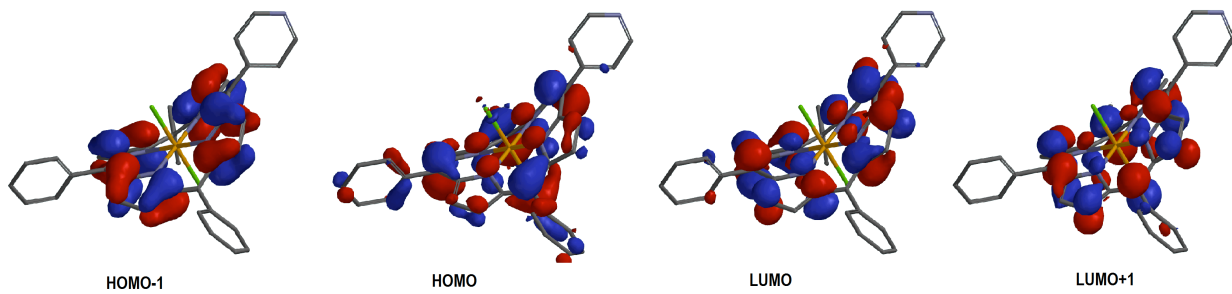

**Figure S40** Calculated molecular orbitals of **2b**.

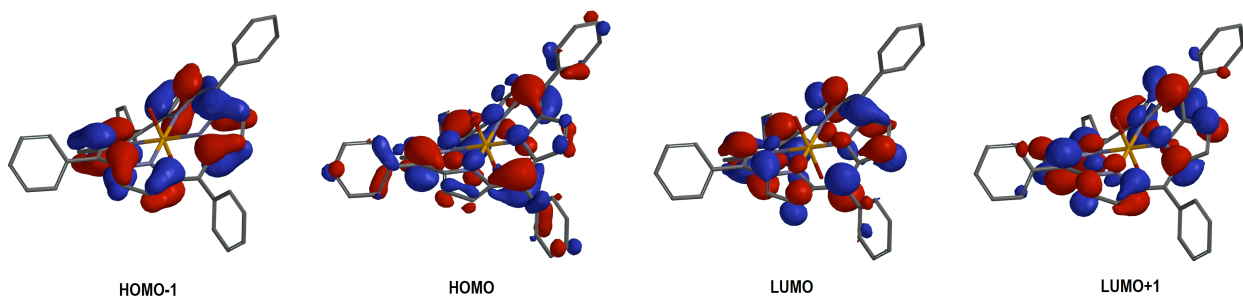

**Figure S41** Calculated molecular orbitals of **3b**.

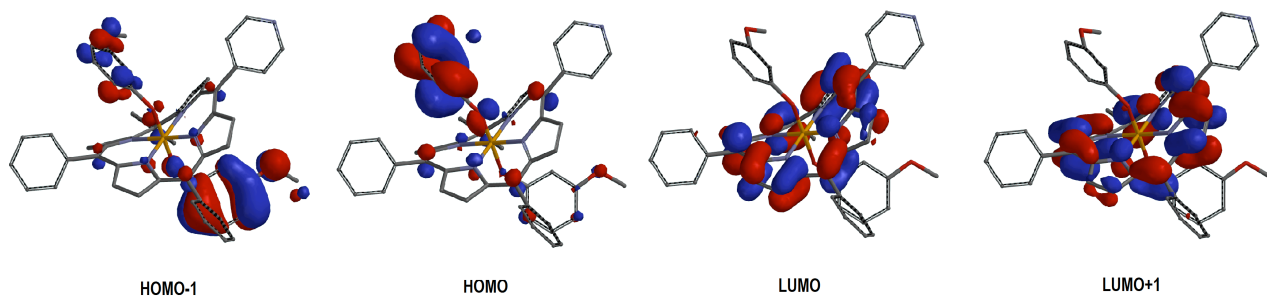

**Figure S42** Calculated molecular orbitals of **4b**.

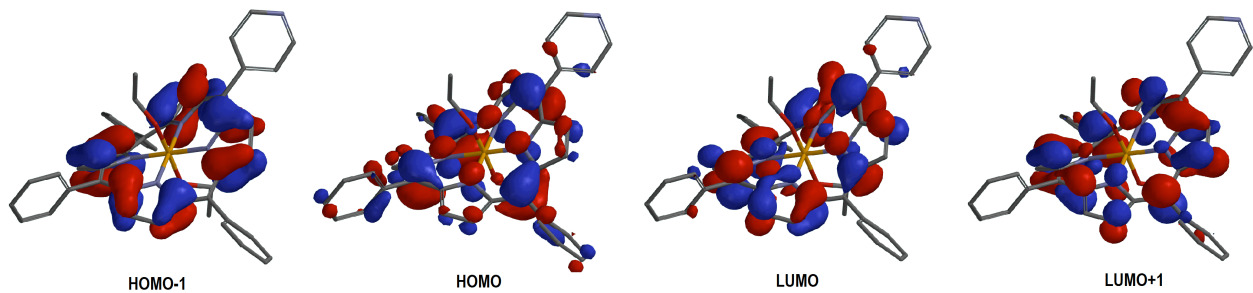

**Figure S43** Calculated molecular orbitals of **5b**.



## References

- 1 M. T. Barton, N. M. Rowley, P. R. Ashton, C. J. Jones, N. Spencer, M. S. Tolleya and L. J. Yellowleesb, *New J. Chem.*, 2000, **24**, 555–560.
- 2 C. J. Carrano and M. Tsutsui, *J. Coord. Chem.*, 1977, **7**, 79–83.
- 3 J. P. Strachan, S. Gentemann, J. Seth, W. A. Kalsbeck, J. S. Lindsey, D. Holten and D. F. Bocian, *J. Am. Chem. Soc.*, 1997, **119**, 11191–11201.
- 4 R. Schmidt, K. Seikel and H.-D. Brauer, *J. Phys. Chem.*, 1989, **93**, 4507–4511.
- 5 J. Davila and A. Harriman, *Photochem. Photobiol.*, 1990, **51**, 9–19.
- 6 K. Shirono, T. Morimatsu and F. Takemura, *J. Chem. Eng. Data*, 2008, **53**, 1867–1871.
- 7 D. Lala, J. F. Rabek and B. Ranby, *Eur. Polym. J.*, 1980, **16**, 735–744.
- 8 E. N. Golubeva, E. M. Zubanova, M. Y. Melnikov, F. E. Gostev, I. V. Shelaev and V. A. Nadochenko, *Dalt. Trans.*, 2014, **43**, 17820–17827.
